## Title

# Beyond Volume: Unraveling the Genetics of Human Brain Geometry

## Authors

Sabrina A. Primus<sup>1,2,3</sup>, Felix Hoffstaedter<sup>4,5</sup>, Federico Raimondo<sup>4,5</sup>, Simon B. Eickhoff<sup>4,5</sup>,  
Juliane Winkelmann<sup>1,3,6,7</sup>, Konrad Oexle<sup>1,2,3,†,\*</sup>, Kaustubh R. Patil<sup>4,5,†,\*</sup>

Email of corresponding authors: [konrad.oexle@helmholtz-munich.de](mailto:konrad.oexle@helmholtz-munich.de), [k.patil@fz-juelich.de](mailto:k.patil@fz-juelich.de)

## Affiliations

1 Institute of Neurogenomics, Helmholtz Zentrum München, German Research Center for Environmental Health, Neuherberg, Germany.

2 Neurogenetic Systems Analysis Group, Institute of Neurogenomics, Helmholtz Zentrum München, German Research Center for Environmental Health, Neuherberg, Germany.

3 Institute of Human Genetics, TUM School of Medicine and Health, Technical University of Munich, Munich, Germany.

4 Institute of Neuroscience and Medicine, Brain & Behaviour (INM-7), Research Centre Jülich, Jülich, Germany.

5 Institute of Systems Neuroscience, Medical Faculty, Heinrich Heine University Düsseldorf, Düsseldorf, Germany.

6 Munich Cluster for Systems Neurology (SyNergy), Munich, Germany.

7 German Center for Mental Health (DZPG), partner site Munich–Augsburg, Munich–Augsburg, Germany.

† These authors contributed equally to this work.

## Abstract

Brain geometry impacts brain function. A quantitative encoding of form is provided by the Laplace-Beltrami operator's spectrum of eigenvalues (LBS). We examined LBS genetics of 22 subcortical brain structures including cerebellum in 19,862 healthy White-British UK Biobank participants by multivariate GWAS (MOSTest) on the first 49 eigenvalues each. Controlling for surface and volume, we identified 80 unique variants ( $p < 1/22 * 5E-8$ ) influencing the shapes of one or several structures, with the highest yield (37 variants) for brain stem. The previously known influence of several of these loci on basic morphology, such as volume, is thus shown to also influence complex shape. Known associations of observed loci with blood pressure, neurodegeneration, alcohol consumption, and mental disorders hint at preclinical stages of these conditions potentially mediating the genetic effect on brain morphology. Significant correlations between LBS of several brain structures and the polygenic risks of hypertension, ischemic stroke and schizophrenia evince brain shapes as early biomarkers.

## Teaser

Multivariate association study reveals genetic basis of detailed brain shape beyond volume and possible relations to neurodegenerative diseases.

## 50 MAIN TEXT

### 51 52 Introduction

53 The human brain comprises an intricate constellation of diverse substructures, each of  
54 which has specific functions and forms complex interactions with other parts of the brain.  
55 Investigating the morphological properties of these substructures and deciphering their genetic  
56 underpinnings is imperative for advancing our understanding of the human brain in health and  
57 disease. Previous genetic studies have investigated crude parameters such as volume and surface  
58 area (1–5). The genetics of the intricate shapes of brain structures remain largely unexamined,  
59 however, representing a gap in comprehensive understanding of brain anatomy.

60 The structures within the human brain exhibit a range of shapes, from the more spherical  
61 amygdala to the elongated hippocampus. Basic metrics such as volume and surface area do not  
62 adequately capture the nuanced details of these shapes and thus fall short of providing a sufficient  
63 description of their morphology. There is evidence for a high inter-individual variance in these  
64 intricate details, with a substantial proportion being heritable (6–8). Initial efforts to delve into the  
65 genetic underpinning of this heritable aspect used techniques like voxel-based analysis in  
66 combination with dimension reduction methods (9, 10), or global-to-local representations of brain  
67 shapes (11, 12). Each of these techniques carries its own challenges, including reduced robustness  
68 and accuracy due to suboptimal image registration, high computational effort, or a lack of  
69 physical interpretability due to dimensionality reduction or a prohibitive dimensionality of image-  
70 derived features.

71 The Laplace-Beltrami operator provides a multivariate spectral representation of a shape,  
72 capturing its characteristics in detail (13, 14). The Laplace-Beltrami spectrum (LBS), a set of  
73 ordered eigenvalues, is obtained by solving the Helmholtz equation, a time-independent form of  
74 the wave equation, on a Riemannian manifold which can be the surface of a given brain structure.  
75 Solutions are decomposed into eigenfunctions (also referred to as “eigenmodes”) and their  
76 corresponding eigenvalues representing the natural vibrations and their squared frequencies,  
77 respectively, on the manifold underlying the shape, akin to the harmonic frequencies of the  
78 membrane of a drum. Each sound or other vibration of a membrane can be represented as a  
79 weighted sum of its eigenmodes, relating closely to the theory of spectral analysis in Fourier  
80 series. Necessarily, the eigenmodes are strongly linked to a shape’s geometry, as visualized in a  
81 seminal experiment by Ernst Chladni using vibrating plates (15). It has been asked since then  
82 whether a shape can be represented by a unique series of eigenvalues or, metaphorically, whether  
83 the shape of a drum can be heard (16). While the answer is affirmative for one-dimensional  
84 shapes whose lengths are made audible by the harmonics or pure tones of string instruments, for  
85 instance, this is not true in general for shapes with more than one dimension as there exist  
86 isospectral shapes (17). Nevertheless, the known counterexamples appear to be rare (13) and  
87 under certain symmetry assumptions, a unique assignment is possible (18). Consequentially, a  
88 relatively small subsequence (e.g. 50 eigenvalues) of the increasingly ordered spectrum contains  
89 enough geometric information to uniquely describe a shape by adequately capturing its curvatures  
90 (13, 19–21), although the spectrum usually contains an infinite number of eigenvalues. Following  
91 Ge et al. (6), we refer to this subsequence as the LBS (also known as Shape-DNA (13)). This  
92 multidimensional intrinsic shape representation, as an isometric invariant, is independent of  
93 rotation, translation, and scaling of the coordinate system, eliminating the need for error-prone  
94 inter-individual image registration (22), and behaves continuously with any change in the  
95 manifold. Recently, there is considerable interest in using geometric eigenmodes to explain  
96 shape-associated biological mechanisms (23). The LBS appears to be a more straightforward  
97 shape descriptor, however, which is computed efficiently (21) and thus well suited for large-scale

98 genome-wide association studies (GWASs) which require a quantitative representation of the  
99 shape of brain structures at the individual level.

100 By performing GWAS, we aimed to reveal information on gene loci contributing to the  
101 heritability of brain morphology as quantified by LBS. We derived the LBSs of 22 different brain  
102 structures from a large MRI dataset provided by the UK Biobank (UKB). To reveal shape-specific  
103 signals, we controlled for global characteristics such as brain volume and surface area. Since all  
104 eigenvalues in an LBS contribute to the description of the respective shape, it is important to  
105 study them jointly while accounting for their mutual dependencies. To achieve this, we employed  
106 the state-of-the-art multivariate GWAS tool MOSTest (2), which accounts for the pairwise  
107 correlations between eigenvalues and, by considering their joint distribution, has increased power  
108 for detecting genetic associations. Our study focused on subcortical structures, brain stem and  
109 cerebellum, in keeping with several studies which studied the genetics of their volumes (2, 5, 24–  
110 26). These parts of the brain are not only involved in learning and decision-making processes (27)  
111 but also hotspots of various brain disorders (7, 24–26, 28). We identified specific genetic  
112 influences on their shapes, investigated genetic asymmetries and similarities among structures,  
113 obtained precise estimates of the heritability of these shapes, and performed genetic correlation  
114 and enrichment analyses with respect to biological pathways, traits, and diseases.

## 115 **Results**

### 116 **Multivariate Genome-wide Analyses**

117  
118 MOSTest on the LBS of each of the 22 brain structures in 19,862 healthy, unrelated,  
119 White-British individuals (10,427 female, with mean age $\pm$ SD of 64.3 $\pm$ 7.4 years) yielded a total  
120 of 148 significant SNPs (Bonferroni-corrected for multiple testing  $p < 1/22 * 5E-8 = 2.27E-9$ )  
121 which were each independent (linkage disequilibrium (LD) of  $r^2 < 0.6$ ) in their respective LBS  
122 GWAS. Some of them were significant in multiple brain structures. Thus, across all 22 GWASs,  
123 there were 80 unique SNPs independently associated with the shape of at least one brain structure  
124 (Table S1, Fig. S1-S3). Using FUMA (29) for clumping the results of each brain structure (see  
125 Methods), we identified 62 genomic risk loci in total, of which 48 were shared by at least 2 of the  
126 22 brain structures (Fig. 1). The largest number of independent significant SNPs were found for  
127 brain stem (37) (Fig. 2B), followed by left cerebellum white matter (29). Only the amygdala did  
128 not show any significant signals after Bonferroni correction. The strongest signal was observed  
129 for lead SNP rs13107325 on chromosome 4 with a p-value of 2.15E-74 in association with the  
130 LBS of the left cerebellum white matter. This SNP association was observed most frequently,  
131 appearing in 14 of the 22 brain structures.

132  
133 49 of the 80 independent SNPs, either themselves or via a proxy variant ( $r^2 \geq 0.6$ ), have  
134 previously been identified in GWASs on brain shape-related traits (e.g., volume, surface area, or  
135 cortical thickness) and are listed in the GWAS catalog implemented in FUMA. Of these 80, 13  
136 have been associated exclusively with other traits (not brain shape-related), and 18 were not  
137 related to any GWAS catalog entry (Table S1).

138  
139

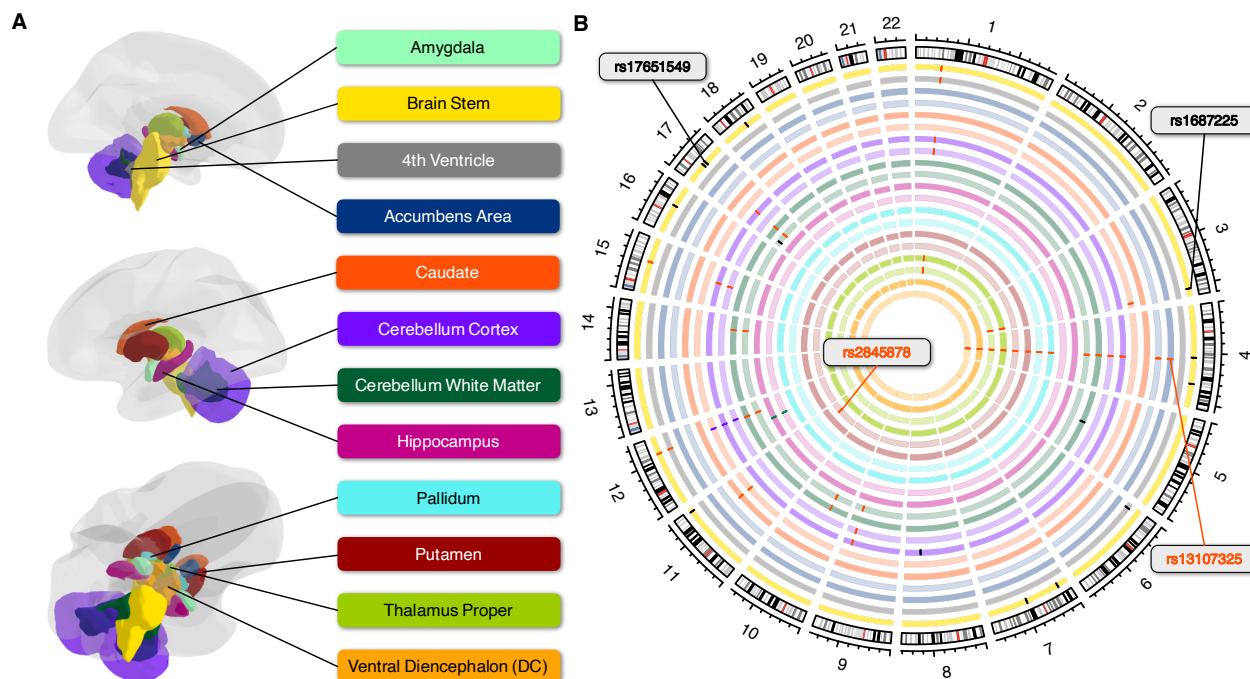

**Fig. 1. Overview of Genomic Risk Loci in Different Brain Structures.** **A:** Anatomical representation of the subcortical brain structures assessed in the present study. **B:** Circular plot indicating the genomic risk loci derived by MOSTest GWAS on each brain structure. Bilateral structures are on neighboring circles and are the same color as in A, with the right-side structure represented more centrally and lighter. If multiple structures share a locus, the bars indicating their position on the respective circles are the same color.

## Functional Annotations of Genomic Risk Loci

We annotated our results using ANNOVAR (30) as implemented in FUMA. Of the 80 independent significant SNPs, 3 were exonic, 27 were intronic, and 33 were in intergenic regions (Fig. 2A, Table S2). All 3 exonic variants (rs13107325, rs1687225, rs601558) were nonsynonymous, each having a combined annotation-dependent depletion (CADD) score higher than 15.23 and belong, therefore, to the 3% most deleterious SNPs (31). We further found 28 exonic nonsynonymous (ExNS) variants in LD ( $r^2 \geq 0.6$ ) with one of the independent significant SNPs, with 17 of them having a CADD score higher than 15.23 or a Regulome DB score (RDB; small scores indicating a high likelihood of being a regulatory SNP) lower than 2 (Table 1, Table S3).

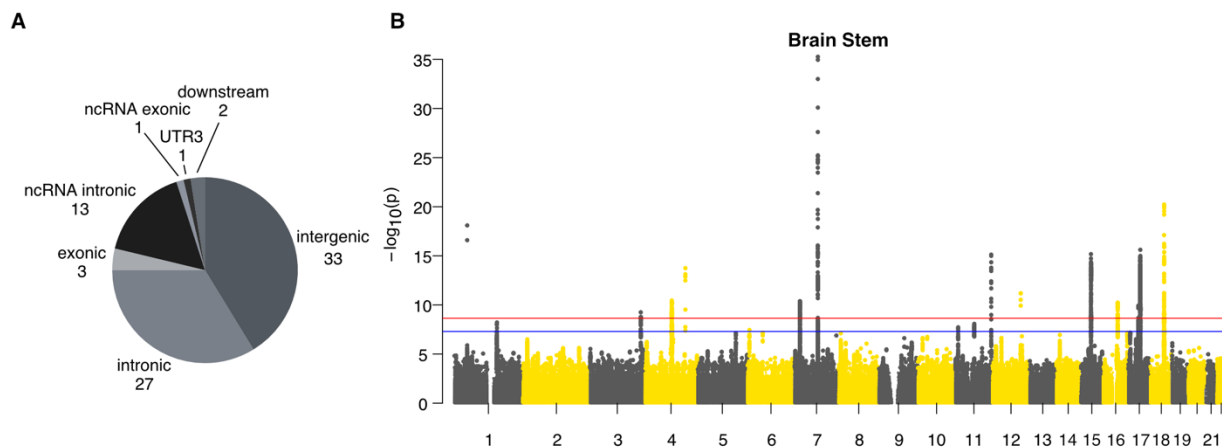

**Fig. 2. SNP-based Associations with the LBS.** **A:** Pie chart showing the frequency of functional annotations of all 80 independent significant SNPs. **B:** Manhattan plot of multivariate MOSTest results of the brain stem with corrected and non-corrected genome-wide significant threshold ( $p=2.27E-9$  (red line),  $p=5E-8$  (blue line)).

151 The pleiotropic missense variant rs13107325, as mentioned above, affects the metal  
 152 transporter *SLC39A8* and is, with a CADD score higher than 20 (23.1), among the 1% most  
 153 deleterious SNPs. While ClinVar (32) and AlphaMissense (33) classify this pleiotropic variant as  
 154 benign, it is a well-known risk factor for schizophrenia (34–36) and has also been found in  
 155 conjunction with inflammation-based diseases like Crohn’s disease (37), blood pressure (38) as  
 156 well as brain imaging phenotypes (9).

157 *VWA5B2* on chromosome 3 comprises the ExNS missense variant rs1687225, an  
 158 independent significant SNP associated with brain stem LBS ( $p=5.6E-10$ ). The CADD score of  
 159 this variant is relatively high (19), but this SNP is not reported in ClinVar and AlphaMissense  
 160 predicts it to be likely benign. Of note, the variant is a brain expression quantitative trait locus  
 161 (eQTL) for different genes and an independent brain cis-eQTL for *VWA5B2* itself according to  
 162 GTEx (v.8) (Table S4).

163 The ExNS missense variant rs601558 on chromosome 8 was significantly associated with  
 164 the LBS of the left cerebellum cortex ( $p=8.0E-11$ ) and is contained in *RSPO2*, for which it is also  
 165 a brain eQTL. Despite a high CADD score of 22, this variant is classified as benign by ClinVar  
 166 and AlphaMissense.

167 Despite its benign classification by ClinVar and AlphaMissense, rs17651549 in *MAPT* on  
 168 chromosome 17, which was associated with the brain stem LBS at  $p=1.0E-13$ , had the highest  
 169 CADD score (26.8) among the ExNS variants. It was in nearly complete LD ( $r^2=0.96$ ) with the  
 170 lead SNP rs568589031 (brain stem,  $p=2.4E-16$ ) of this large genomic risk locus that included  
 171 altogether 6 ExNS SNPs which, according to CADD score, all belong to the 3% most deleterious  
 172 SNPs (Table 1) and act as brain eQTLs of *CRHRI*, *SPPL2C*, *MAPT* and *KANSL1*. Due to its high  
 173 linkage, this large genomic region, also referred to as *MAPT* locus, is known to be highly complex  
 174 (39) and we observed 18 ExNS SNPs being brain eQTLs of 17 protein-coding genes in total  
 175 (Table S5).

| rsID              | Position       | EA | NEA | EAF  | MinP  | CADD | RDB | Gene    | Brain Structure (IndSigSNP, r2)                                                                                                                                                                                                                                                                                                                                                                                                                      |
|-------------------|----------------|----|-----|------|-------|------|-----|---------|------------------------------------------------------------------------------------------------------------------------------------------------------------------------------------------------------------------------------------------------------------------------------------------------------------------------------------------------------------------------------------------------------------------------------------------------------|
| <b>rs1687225</b>  | chr3:183948663 | A  | G   | 0.23 | 6E-10 | 19.0 | 4   | VWA5B2  | Brain Stem ( <b>rs1687225</b> , 1.00)                                                                                                                                                                                                                                                                                                                                                                                                                |
| rs902417          | chr3:183951431 | T  | C   | 0.25 | 7E-08 | 15.4 | 5   | VWA5B2  | Brain Stem ( <b>rs1687225</b> , 0.86)                                                                                                                                                                                                                                                                                                                                                                                                                |
| rs3733197         | chr4:102839287 | A  | G   | 0.35 | 2E-06 | 14.2 | 7   | BANK1   | Left Cerebellum White Matter ( <b>rs114614648</b> , 0.72)                                                                                                                                                                                                                                                                                                                                                                                            |
| <b>rs13107325</b> | chr4:103188709 | T  | C   | 0.08 | 2E-74 | 23.1 | 5   | SLC39A8 | Accumbens area (right + left: <b>rs13107325</b> , 1.00);<br>Cerebellum Cortex (right + left: <b>rs13107325</b> , 1.00);<br>Cerebellum White Matter (right + left: <b>rs13107325</b> , 1.00);<br>Pallidum (right + left: <b>rs13107325</b> , 1.00);<br>Putamen (right + left: <b>rs13107325</b> , 1.00);<br>Ventral DC (right + left: <b>rs13107325</b> , 1.00);<br>Thalamus Proper (right: <b>rs13107325</b> , 1.00; left: <b>rs13135092</b> , 0.93) |
| rs7800072         | chr7:84628989  | G  | T   | 0.32 | 3E-08 | 18.3 | 5   | SEMA3D  | Brain Stem ( <b>rs10247311</b> , 0.90)                                                                                                                                                                                                                                                                                                                                                                                                               |
| <b>rs601558</b>   | chr8:108970367 | G  | A   | 0.34 | 8E-11 | 22.0 | 5   | RSPO2   | Left Cerebellum Cortex ( <b>rs601558</b> , 1.00)                                                                                                                                                                                                                                                                                                                                                                                                     |
| rs36045050        | chr14:69257858 | T  | C   | 0.26 | 8E-09 | 7.0  | 2b  | ZFP36L1 | Cerebellum White Matter (right: <b>rs1547050</b> , 0.74; left: <b>rs12435718</b> , 0.73)                                                                                                                                                                                                                                                                                                                                                             |



|                   |                |   |   |      |       |      |    |          |                                                                                                                          |
|-------------------|----------------|---|---|------|-------|------|----|----------|--------------------------------------------------------------------------------------------------------------------------|
| <b>rs4646626</b>  | chr15:58256127 | T | C | 0.46 | 6E-15 | 19.7 | NA | ALDH1A2  | Brain Stem ( <i>rs1061278</i> , 0.91); Cerebellum Cortex (right: <i>rs3742960</i> , 0.92; left: <i>rs3742959</i> , 0.92) |
| rs1877031         | chr17:37814080 | A | G | 0.33 | 1E-06 | 23.1 | NA | STARD3   | Brain Stem ( <i>rs2271308</i> , 0.80)                                                                                    |
| rs1058808         | chr17:37884037 | G | C | 0.33 | 1E-07 | 23.5 | 5  | ERBB2    | Brain Stem ( <i>rs2271308</i> , 0.64)                                                                                    |
| rs12949256        | chr17:43507297 | T | C | 0.19 | 1E-08 | 15.0 | 4  | ARHGAP27 | Brain Stem ( <i>rs568589031</i> , 0.70)                                                                                  |
| <b>rs16940674</b> | chr17:43910507 | T | C | 0.24 | 1E-13 | 17.6 | 1f | CRHR1    | Brain Stem ( <i>rs568589031</i> , 0.96)                                                                                  |
| <b>rs16940681</b> | chr17:43912159 | C | G | 0.24 | 1E-13 | 5.0  | 4  | CRHR1    | Brain Stem ( <i>rs568589031</i> , 0.96)                                                                                  |
| <b>rs62621252</b> | chr17:43922942 | C | T | 0.24 | 6E-14 | 6.3  | 5  | SPPL2C   | Brain Stem ( <i>rs568589031</i> , 0.96)                                                                                  |
| <b>rs62054815</b> | chr17:43923266 | A | G | 0.24 | 1E-13 | 0.0  | 5  | SPPL2C   | Brain Stem ( <i>rs568589031</i> , 0.96)                                                                                  |
| <b>rs12185233</b> | chr17:43923654 | C | G | 0.24 | 5E-14 | 23.5 | 1f | SPPL2C   | Brain Stem ( <i>rs568589031</i> , 0.95)                                                                                  |
| <b>rs12185268</b> | chr17:43923683 | G | A | 0.24 | 1E-13 | 8.7  | 1f | SPPL2C   | Brain Stem ( <i>rs568589031</i> , 0.96)                                                                                  |
| <b>rs12373123</b> | chr17:43924073 | C | T | 0.24 | 1E-13 | 23.3 | 1f | SPPL2C   | Brain Stem ( <i>rs568589031</i> , 0.96)                                                                                  |
| <b>rs12373139</b> | chr17:43924130 | A | G | 0.24 | 1E-13 | 4.0  | 1f | SPPL2C   | Brain Stem ( <i>rs568589031</i> , 0.96)                                                                                  |
| <b>rs12373142</b> | chr17:43924200 | G | C | 0.24 | 7E-13 | 7.5  | 1f | SPPL2C   | Brain Stem ( <i>rs568589031</i> , 0.96)                                                                                  |
| <b>rs63750417</b> | chr17:44060775 | T | C | 0.24 | 1E-13 | 11.9 | 5  | MAPT     | Brain Stem ( <i>rs568589031</i> , 0.96)                                                                                  |
| <b>rs62063786</b> | chr17:44061023 | A | G | 0.24 | 9E-14 | 7.9  | 5  | MAPT     | Brain Stem ( <i>rs568589031</i> , 0.96)                                                                                  |
| <b>rs62063787</b> | chr17:44061036 | C | T | 0.24 | 1E-13 | 0.2  | 5  | MAPT     | Brain Stem ( <i>rs568589031</i> , 0.96)                                                                                  |
| <b>rs17651549</b> | chr17:44061278 | T | C | 0.24 | 1E-13 | 26.8 | 1f | MAPT     | Brain Stem ( <i>rs568589031</i> , 0.96)                                                                                  |
| <b>rs10445337</b> | chr17:44067400 | C | T | 0.24 | 2E-13 | 19.2 | 1f | MAPT     | Brain Stem ( <i>rs568589031</i> , 0.96)                                                                                  |
| <b>rs62063857</b> | chr17:44076665 | G | A | 0.24 | 1E-13 | 1.5  | 7  | STH      | Brain Stem ( <i>rs568589031</i> , 0.96)                                                                                  |
| <b>rs34579536</b> | chr17:44108906 | G | A | 0.24 | 2E-13 | 14.4 | 3a | KANSL1   | Brain Stem ( <i>rs568589031</i> , 0.96)                                                                                  |
| <b>rs34043286</b> | chr17:44117119 | G | A | 0.24 | 1E-13 | 21.0 | 4  | KANSL1   | Brain Stem ( <i>rs568589031</i> , 0.96)                                                                                  |

**Table 1. Exonic Nonsynonymous Variants in LD ( $r^2 \geq 0.6$ ) with one of the Independent Significant SNPs Across all Brain Structures.** Variants are listed with non-effect allele (NEA), effect allele (EA), and effect allele frequency (EAF), minimal significance level (minP) across all structures, CADD and RDB scores, most likely affected gene, and the independent significant SNPs (IndSigSNP) to which they are linked most strongly as indicated by the correlation value  $r^2$ . The respective IndSigSNP may differ between brain structures according to the structure-specific GWAS results. Blue-marked variants have CADD > 15.23 or RDB < 2. Bold typing of a variant indicates genome-wide significance in at least one brain structure. Variants in italics are independent significant SNPs.

## Asymmetry and Similarity of Brain Structures

To assess possible genetic asymmetries and similarities of brain structures, we compared the p-values of the 80 unique independent SNPs between structures and hemispheres (Table S6). Applying a conservative Bonferroni correction for 80\*22 comparisons to the nominal threshold of 0.05, we found five genome-wide significant ( $p < 2.27E-9$ ) SNPs for cerebellum white matter and one for putamen that were not significant in the respective contralateral structures. At nominal significance, only the intron variant rs2845878 in *FAT3*, which came

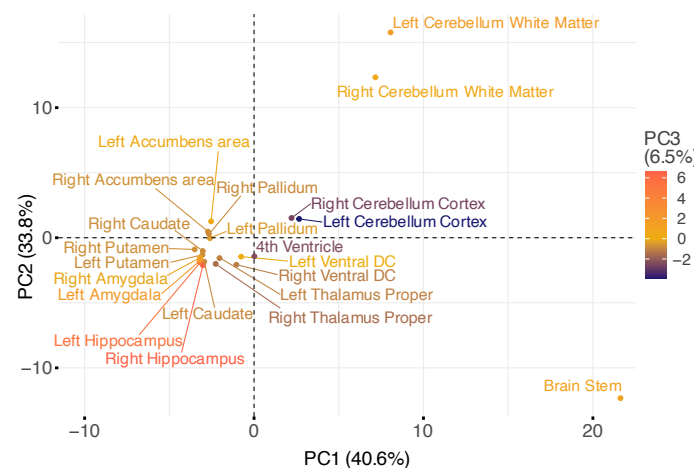

**Fig. 3. PCA of  $-\log_{10}$  scaled p-values of the 80 independent significant SNPs across all structures.** Plot shows the first two PCs with corresponding explained variance in brackets behind. Structures are colored according to the third principal component.

up in the GWAS on right putamen, lacked symmetry. Proxy variants of rs2845878 ( $r_2 \geq 0.6$ ) have been linked to the mean volume of caudate and putamen according to GWAS catalog (4). Principal component (PC) analysis of  $-\log_{10}$  transformed p-values of these 80 SNPs showed a high level of symmetry and similarity in genetic signals (Fig. 3): All subcortical structures as well as the cerebellum cortex were mapped close to each other in this PC space, independent of their hemispherical assignment. Moreover, most structures shared genetic architecture according to their placement adjacent to each other as in case of the basal ganglia, for instance. However, brain stem, cerebellum white matter and hippocampus were substantially distanced from the others in at least one of the first three PCs. Hippocampus was probably notable for its dissimilar pattern of few associated SNPs while the particular position of brain stem and cerebellum white matter could be due to their highly significant signals in addition to their quantity.

When investigating genetics that were similar for several structures, the ExNS variant rs13107325 in *SLC39A8* along with several others within the same risk locus on chromosome 4, the intergenic SNP rs6658111 on chromosome 1 and the intronic variant rs12146713 in *NUAK1* on chromosome 12 emerged as the most frequently shared independent SNPs. After Bonferroni correction for  $80 \times 22$  comparisons, these three were significant in 10 to 15 structures and nominally significant in 19, respectively, 20 structures (Table S6). Apart from the pleiotropic rs13107325, the other two variants have so far only been linked to various brain shape traits such as volume, surface area and cortical thickness according to the GWAS catalog (Table S7). Interestingly, rs12146713 and rs13107325 have also recently been linked to structural connectivity measures (40) which supports the notion that they have an overarching effect on brain structuring.

## Gene-mapping and Gene-enrichment Analysis

We first annotated all SNPs passing QC to 18383 protein-coding genes using MAGMA (41) and calculated a p-value for each gene by applying the SNP-wise mean model (see Methods). The brain stem stood out with 20 protein-coding genes being significantly associated with its shape in the gene-based analysis after Bonferroni correction for 22 brain structures and 18383 protein-coding genes ( $p < 0.05 / (22 \times 18383)$ ) (Fig. 4A). Here, *CRHR1* showed the strongest signal ( $p = 5.2E-15$ ). This gene belongs to the extended *MAPT* locus mentioned above, which came up as generally highly significant and has, together with *MAPT*, which encodes for the microtubule-associated protein tau, often been associated with neurodegenerative disorders (42, 43).

Next, we used PoPS (44) for gene prioritization, a tool that assigns polygenic priority scores to each gene by fitting their MAGMA z-scores based on trait-relevant gene features extracted from cell-type-specific gene expressions, biological pathways, and protein-protein interactions. Since PoPS works best when combined with orthogonal methods, we also mapped each SNP to the nearest genes. Reranking the genes according to the mean of the two ranks that resulted from the two methods, we prioritized all genes with rank  $\leq 2$  at each locus (see Methods, Table S8).

Based on these genes, a gene set enrichment analysis was conducted using FUMA's Gene2Func method. For bilateral brain structures the two gene sets were joined in this analysis due to similar genetic architectures on both sides (see above and Fig. 3). Afterwards, the overlap and degree of overrepresentation of all prioritized genes in predefined gene sets were examined.

At the locus of the most significant SNP in this study, rs13107325, two genes were usually prioritized, *BANK1* and *SLC39A8* (Table S8). The previously known pleiotropy of this genomic region was confirmed by the diversity of our enrichment results which included adventurousness, hypertension, multisite chronic pain, general cognitive ability, and alcohol consumption (Fig. 5A,

242 Fig. S4-S5 for all other structures). Especially the overlap with alcohol consumption was most  
 243 prominent.

244 These two genes and 23 others were prioritized for the cerebellum white matter. However,  
 245 given this entire set of genes, *BANK1* and *SLC39A8* were not significantly overrepresented in any  
 246 gene set. Instead, the other genes, which were primarily prioritized by the cerebellar white matter,  
 247 were enriched in several regulatory pathways associated with neurological and developmental  
 248 processes (Fig. 5B).

249 For brain stem, Gene2Func identified gene sets linked to brain morphology and lung  
 250 function according to GWAS catalog (Fig. 5C) as well as multiple biological processes from the

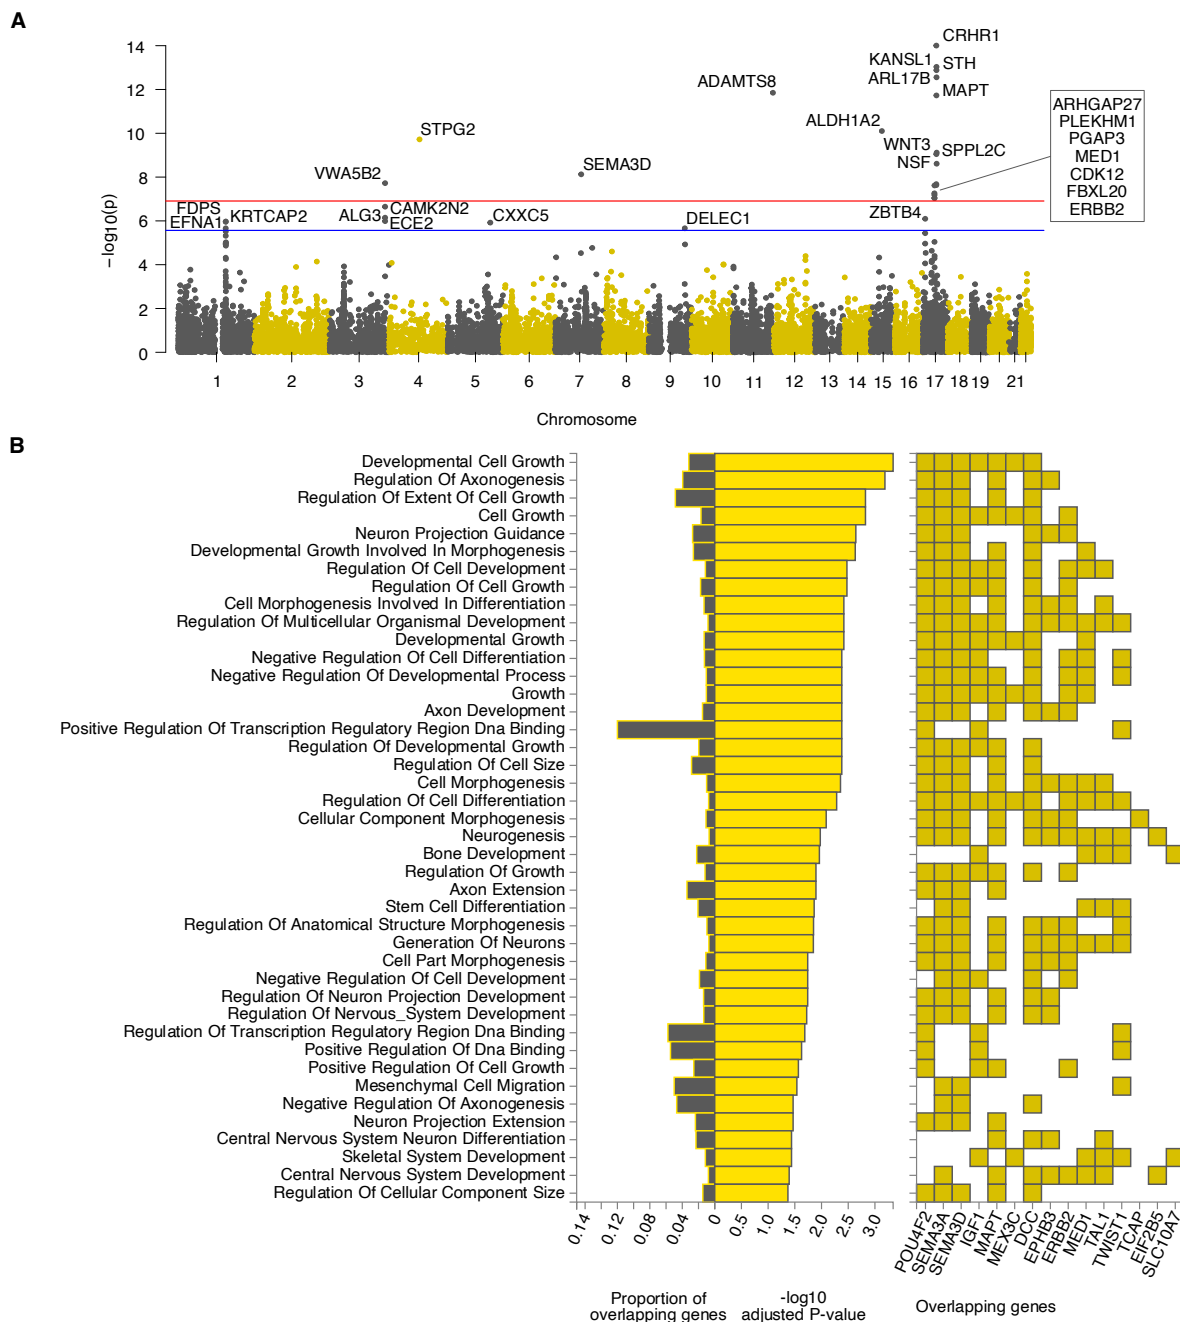

**Fig. 4. Gene Analysis and Enrichment in Brain Stem. A:** Manhattan plot of MAGMA gene analysis of brain stem results using SNP-wise mean model. **B:** Hypergeometric tests of overrepresentation and overlap of prioritized genes with predefined gene sets using FUMA Gene2Func. Overlap with gene sets of GO biological processes (MsigDB c5). P-values were corrected by the Benjamini-Hochberg method for multiple testing.



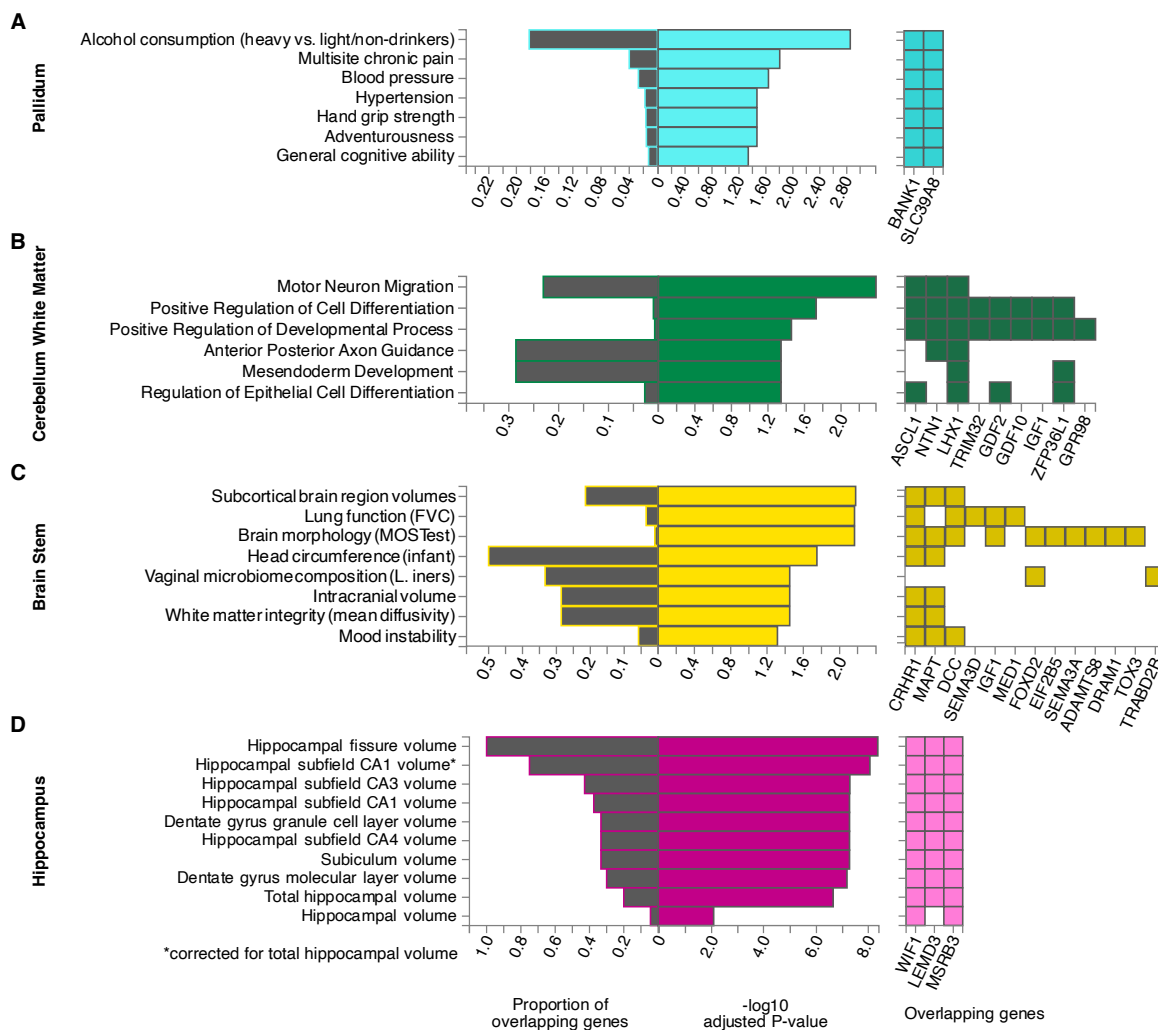

**Fig. 5. Significant Gene Enrichment Results of Selected Brain Structures.** Hypergeometric tests of overrepresentation and overlap of prioritized genes with predefined gene sets from GWAS catalog traits (A, C, D) and GO biological processes (B). Pallidum (A) was chosen as a representative for structures prioritizing *BANK1* and *SLC39A8* at the pleiotropic locus of rs13107325. All other structures can be found in the supplements. Cerebellum white matter (B), hippocampus (C) and brain stem (D) showed a substantially different genetic pattern before (Fig. 3). P-values were corrected by the Benjamini-Hochberg method for multiple tests in each category.

Gene Ontology Resource (GO) involved in cell and nervous system development and regulation (Fig. 4B). Brain-stem-shape-related genes were additionally enriched in a set of genes differentially expressed in early infancy brain tissue (Fig. S6).

Genes prioritized for hippocampus shape revealed a complete overlap with genes associated with its fissure, but only a partial overlap with its total volume (< 20%), reinforcing the validity and utility of our shape analysis (Fig. 5D).

### Associations with Polygenic Risk Scores

To investigate associations between brain-related traits and the LBS of individual brain structures, we extracted polygenic risk scores (PRS) from UKB for Alzheimer’s disease (AD), bipolar disorder (BD), ischemic stroke (ISS), multiple sclerosis (MS), Parkinson’s disease (PD), and schizophrenia (SCZ). Due to results of our gene-set enrichment analyses (see above), we also included the PRS for alcohol use disorder (ALC) as available in the PGScatalog. 10 of the pairwise partial correlations (i.e. adjusted for covariates, see Methods) between the PRSs were significant (Bonferroni-corrected  $p < 0.05$ ), most prominently between SCZ and BD ( $r = 0.37$ ,

p<1E-300), ALC and SCZ ( $r = 0.12$ ,  $p = 1.5E-60$ ), and ALC and BD ( $r = 0.09$ ,  $p = 1.7E-38$ ) (Table S9-S11).

Following Sha et. al (45), we performed canonical correlation analysis (CCA) between the LBS of each of the 22 brain structures and each of those PRSs (see Methods). Here, the CCA determined a linear combination of the eigenvalues of an LBS (i.e. the canonical variable) which correlates maximally with the PRS across all examined individuals. We found 31 significant correlations after Benjamini-Hochberg (46) correction ( $p < 0.05$ ) within each PRS, 11 of which also stayed significant after additional Bonferroni correction for 6 independent PRSs (two-level correction), and 6 survived an overall Bonferroni correction for  $22 \times 6$  tests (Fig. 6). As a balance between false discoveries and sensitivity, we chose this two-level correction to further investigate associations between PRSs and brain structures. Significant correlations ranged from 0.065 to 0.080 (mean 0.070). While we found several highly significant correlations with various brain structures for ISS and SCZ, the polygenetic risk for BD and PD did not correlate with any brain shape at all. This is particularly notable since the PRS of BD and SCZ had substantial correlation (see above). The PRSs of AD, ALC, and MS indicated only suggestive correlations with LBSs.

To interpret these findings at the level of the eigenvalues, we calculated the mean loadings in each CCA and counted the number of negative and positive values. We noticed that in some results it was possible to assess a common direction of effects. Among all significant results, the right ventral diencephalon (DC) revealed the strongest (i.e. largest absolute) mean loading of -0.295 with 96% of all eigenvalues having a negative correlation with the canonical variable and, in case of a common direction, by that with the PRS of SCZ. This finding suggested that a person may have a higher genetic risk for schizophrenia if the right ventral DC is shaped in such a way that its eigenvalues (frequencies) are lower. This, for example, can be the case for a smoother surface or a less curved shape. A similar deduction in case of brain stem suggested that a less

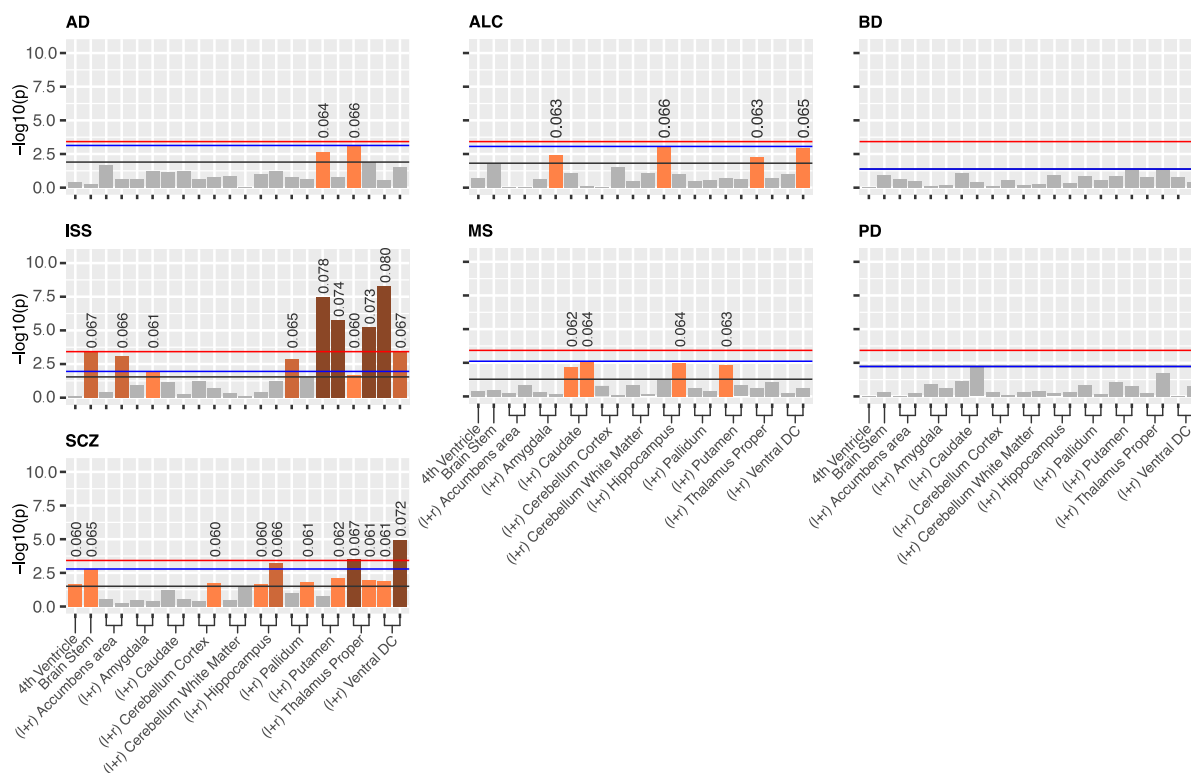

**Fig. 6. P-values of CCA Results of Different PRS with Various Brain Structures.** Bar charts show the  $-\log_{10}$  scaled p-values of the correlations between polygenetic risk scores and LBS of different brain structures at different significance levels: Bonferroni-corrected for 22 brain structures and 6 independent PRS (red line), FDR-corrected within each PRS (black line), FDR-corrected within each PRS + Bonferroni-corrected for 6 independent PRS (blue line). Above significant p-values, the correlation value is stated. Bilateral structures are labeled once and the one in the left hemisphere is placed more left.

290 smooth or more curved shape shows a higher risk for ISS (mean loading 0.186 with ~92%  
 291 loadings positive).

292 Although most correlations remained above the significance threshold, clustering of the  
 293 mean loadings showed similar tendencies for both hemispheres suggesting no asymmetric  
 294 behavior (Fig. S7).

## 295 Heritability

297 We used SCORE (47) to estimate the univariate heritability of each eigenvalue which  
 298 utilizes the individual genotype data similar to the analysis by Ge et al. (6). We also calculated the  
 299 multidimensional heritability (6) (see Methods) for each brain structure (Table 2, Table S12).  
 300 Overall, the multidimensional heritability of the LBS was significant for all examined brain  
 301 structures (Bonferroni corrected for 22 structures; range  $h^2$ : [9.5%, 29.6%], mean 17.2%). The  
 302 highest heritability was found for the caudate (left: 29.6% and right: 27.3%) as well as for the  
 303 brain stem (28.2%). We further computed the multidimensional LBS heritability for combined  
 304 structures to compare them with the results from Ge et al. (Table 2, Fig. S8) and found a positive  
 305 linear correlation (Pearson's  $r = 0.735$ ,  $p = 0.038$ ). However, Spearman's rho did not reach  
 306 statistical significance ( $\rho = 0.714$ ,  $p = 0.058$ ), suggesting a nonmonotonic relationship.  
 307 Excluding the 4<sup>th</sup> Ventricle, which may be an outlier in Ge et al. due to its large standard error and

| Brain Structure               | $h^2$        | SE     | $h^2$<br>combined | SE<br>combined | $h^2$<br>Ge2016 | SE<br>Ge2016 |
|-------------------------------|--------------|--------|-------------------|----------------|-----------------|--------------|
| 4th Ventricle                 | <b>0.169</b> | 3.0E-3 | <b>0.169</b>      | 3.0E-03        | 0.005           | 0.208        |
| Left Accumbens area           | <b>0.134</b> | 2.8E-3 | <b>0.116</b>      | 1.9E-3         | <i>0.237</i>    | 0.135        |
| Right Accumbens area          | <b>0.095</b> | 2.4E-3 |                   |                |                 |              |
| Left Amygdala                 | <b>0.105</b> | 2.5E-3 | <b>0.118</b>      | 1.8E-3         | -               | -            |
| Right Amygdala                | <b>0.134</b> | 2.8E-3 |                   |                |                 |              |
| Left Caudate                  | <b>0.296</b> | 1.9E-3 | <b>0.285</b>      | 1.4E-3         | <b>0.499</b>    | 0.188        |
| Right Caudate                 | <b>0.273</b> | 2.0E-3 |                   |                |                 |              |
| Brain Stem                    | <b>0.282</b> | 5.4E-3 | <b>0.198</b>      | 1.5E-3         | <b>0.452</b>    | 0.192        |
| Left Cerebellum Cortex        | <b>0.186</b> | 2.9E-3 |                   |                |                 |              |
| Right Cerebellum Cortex       | <b>0.194</b> | 2.8E-3 |                   |                |                 |              |
| Left Cerebellum White Matter  | <b>0.195</b> | 2.6E-3 |                   |                |                 |              |
| Right Cerebellum White Matter | <b>0.148</b> | 2.6E-3 |                   |                |                 |              |
| Left Hippocampus              | <b>0.187</b> | 2.6E-3 | <b>0.199</b>      | 1.9E-3         | <b>0.347</b>    | 0.169        |
| Right Hippocampus             | <b>0.210</b> | 2.7E-3 |                   |                |                 |              |
| Left Pallidum                 | <b>0.124</b> | 2.9E-3 | <b>0.122</b>      | 2.0E-3         | 0.061           | 0.117        |
| Right Pallidum                | <b>0.120</b> | 2.8E-3 |                   |                |                 |              |
| Left Putamen                  | <b>0.158</b> | 2.7E-3 | <b>0.183</b>      | 1.9E-3         | <b>0.413</b>    | 0.148        |
| Right Putamen                 | <b>0.210</b> | 2.8E-3 |                   |                |                 |              |
| Left Thalamus Proper          | <b>0.134</b> | 2.7E-3 | <b>0.132</b>      | 1.9E-3         | 0.086           | 0.143        |
| Right Thalamus Proper         | <b>0.130</b> | 2.7E-3 |                   |                |                 |              |
| Left Ventral DC               | <b>0.122</b> | 2.7E-3 | <b>0.146</b>      | 2.1E-3         | -               | -            |
| Right Ventral DC              | <b>0.169</b> | 3.2E-3 |                   |                |                 |              |

**Table 2. Heritability Estimates of Different Brain Structures.** Heritability estimates are presented for single brain structures ( $h^2$ ) and for combined regions ( $h^2$  combined) as well as their standard errors (SE and SE combined). Here, numbers in bold are significant after Bonferroni correction for 22 brain structures. For comparison, the estimates from Ge et al. are listed in the last two columns. Italic numbers are nominally significant and bold ones are significant after false discovery rate correction in (6).

308 very low heritability, both results affirm a significant correlation ( $r = 0.844$ ,  $p = 0.017$  and  $\rho =$   
309  $0.786$ ,  $p = 0.048$ ). We further conducted a Wald test for different heritability in each combined  
310 brain structure with  $H_0: h^2 = h_{Ge}^2$ , which could not be rejected at a 0.05 significance threshold for  
311 any of the structures (see Methods and Table S13), implying that our heritability estimates do not  
312 differ significantly from those of Ge et al.

## 313 314 **Replication**

315 On the 20% replication sample ( $N=4961$ ), we performed a replication analysis of the 80  
316 independent SNPs (see Methods). For each brain structure, we only investigated those variants of  
317 the 80 SNPs which had also shown Bonferroni-corrected genome-wide significance in the  
318 respective discovery GWAS. We replicated 51.4% (76/148) of all significant associations of these  
319 80 SNPs at a 0.05 significance level after FDR correction and 60.8% (90/148) at nominal  
320 significance level (Table S14). Hence, using a similar replication sample size, our replication rate  
321 was at least 33% larger than in van der Meer et al. (2) who introduced MOSTest in their study on  
322 brain volumes. To assess what can be expected as replication rate, we split our discovery set into  
323 4 sets that equaled the replication set in size and sex and age distribution and checked the  
324 “replication rate” in these sets. We obtained rates between 66.2% and 80.4% at FDR-controlled  
325 significance and between 68.2% and 82.4% at nominal significance (Table S15). In view of the  
326 fact that replication rates of GWASs usually are much lower than expected by power analysis  
327 (48% observed vs 91% expected), even after correction for winners’ curse (48% vs 54%) (48),  
328 this simple simulation showed that our actual replication rate in a set of independent individuals  
329 was in keeping with the size of that set.

## 330 331 332 **Discussion**

333 Examining the complex relationship among brain morphology, genetics and neurological  
334 disorders is crucial for unravelling the underlying causes and enhancing our understanding of the  
335 anatomy of the human brain and diseases. The Laplace-Beltrami operator provides a useful  
336 spectral representation for describing shape characteristics. Adequately describing curvatures and  
337 being an informative topological fingerprint of the shape (19), the Laplace-Beltrami spectrum  
338 (LBS) captures more information compared to global shape quantities such as surface area or  
339 volume. Specifically, it captures local shape effects but still represents the whole form of an  
340 object since the respective eigenmodes are defined everywhere on the structure. Furthermore, the  
341 shape is described by a relatively small number of values, which simplifies data handling, and, in  
342 contrast to other dimension reduction methods like principal component analysis, spatial  
343 interpretability is still given. Also, it does not depend on error-prone interindividual image  
344 registration which is required by other methods. Using the LBS thus allowed us to specifically  
345 address the variation in shape independent of volume or surface area and to disentangle the  
346 genetics of morphology beyond those global properties. While the eigenmodes and their potential  
347 to explain shape-associated biological mechanisms have been recently explored (23), the  
348 eigenvalues were previously found to have considerable heritability in the case of subcortical  
349 brain structures and cerebellum (6). However, neither the genetic architecture at SNP level of the  
350 shape of brain structures nor possible relations to disease genetics have been investigated yet.  
351 Using state-of-the-art GWAS and the LBS (a set of eigenvalues) as a multidimensional  
352 phenotype, we have dissected the genetics of the shape of 22 brain structures in 19,862 White-  
353 British individuals from the UK Biobank.

354 Overall, we identified 148 significant SNP associations that were independent in their  
355 respective GWAS. Since some SNPs were significantly associated with more than one brain

356 structure, this resulted in 80 unique significant SNPs being independent across the 22 GWASs.  
357 Most of them, particularly the most significant ones, were detected in association with structures  
358 in the posterior fossa (brain stem and cerebellum). In contrast, we found no significant signal for  
359 the LBS of the amygdala. Due to the simple almond-like shape, crude measures like volume and  
360 surface area might already capture amygdala's shape well enough (Supplements, Table S16). This  
361 could possibly explain the lack of genetic signal in our study since we controlled for both volume  
362 and surface area.

363 Of those 80 SNPs, 37 have previously been reported as genome-wide significant in a large  
364 GWAS on subcortical volumes (2), while 4 were identified in a large GWAS meta-analysis on  
365 total brain volume (1). This overlap with volume-associated SNPs suggests pleiotropic effects of  
366 the respective gene loci, affecting both volume and shape characteristics independent of volume,  
367 while it is unlikely that pure volume associations were picked since we controlled for volume.  
368 Indeed, our hippocampus LBS GWAS, for instance, replicated 100% of all loci previously  
369 associated with hippocampal fissure size (49), which obviously influences hippocampal shape,  
370 while accounting for only 20% of the loci associated with total hippocampal volume (Fig. 5D).

371 31 of the 80 independent SNPs were not associated with any brain shape-related trait  
372 according to GWAS catalog, neither by themselves nor by any variant in LD with them ( $r^2 \geq$   
373 0.6), and 18 were not listed at all (Table S1). This shows a substantial degree of novelty, that is,  
374 undiscovered genetic effects specific to shape of brain structures and supports the notion of SNPs  
375 affecting the development of form independent of growth.

376 Using a 15 times larger sample size, we were able to substantially refine the LBS SNP-  
377 heritability estimates of subcortical brain structures, including cerebellum, previously provided by  
378 Ge et al. (6) (N=1320). While their estimates ranged from 0.005 to 0.5, some being non-  
379 significant due to large standard errors of 0.12 to 0.21, our estimates were between 0.1 and 0.3, all  
380 being significant with much lower standard errors ( $\leq 0.005$ ). In fact, statistical tests implied that  
381 our heritability estimates did not differ significantly from those of Ge et al. This was likely due to  
382 the much larger standard errors of their estimates but may also be a consequence of the younger  
383 age span in their cohort (18-35 years). Overall, we achieved results with higher statistical  
384 significance corresponding to our larger sample size and also likely due to our additional control  
385 for total brain volume, the respective local surface area, and MRI scan quality. The refined  
386 estimates were approximately equal to the SNP-heritability of volumetric traits of subcortical  
387 structures which Hibar et al. (3) derived from similar sample sizes, or even larger as in the case of  
388 caudate, hippocampus and putamen, for which they derived a SNP-heritability of about 0.11 with  
389 95%-CI < 0.16 each, while we found values of 0.29, 0.20, and 0.18 respectively.

390 Bilateral structures showed similar genetic architecture of LBS (Fig. 3), which could be  
391 expected due to their symmetry. Moreover, genetic architecture was also shared between  
392 structures, as suggested by their adjacent positions, e.g. in the case of the basal ganglia. The two  
393 noticeably frequently shared variants rs13107325 and rs12146713 on *SLC39A8* and *NUAK1*,  
394 respectively, seem to affect brain shape globally as they have recently been associated with the  
395 structural connectome (40). While *SLC39A8*, as a brain metal transporter, is involved in several  
396 brain and neurodevelopmental traits (see below), *NUAK1* is also known to regulate axon  
397 branching by controlling mitochondrial distribution (50). The genetic associations of cerebellum  
398 and brain stem LBS were more different. Brain stem stood out due to a high number of specific  
399 association signals. These included the exonic nonsynonymous (ExNS) variant rs1687225 in  
400 *VWA5B2*, the gene of von Willebrand factor A domain containing protein 5B2. This missense  
401 variant belongs to the 3% most deleterious variants (according to CADD score) and was also an  
402 independent brain cis-eQTL of *VWA5B2* according to GTEx (v.8). Proxy variants of rs1687225



403 have been reported as being associated with brain morphology (2), cortical thickness (51), and  
404 educational achievement (52).

405 An extended genomic risk locus on chromosome 17 with lead SNP rs568589031 was also  
406 rather specific for the brain stem. ExNS variant rs17651549 at this locus had the highest CADD  
407 score (26.8) of all variants in LD with any of the independent significant SNPs. It affects *MAPT*  
408 which was among the most significant signals in MAGMA gene-based analysis of the brain stem  
409 LBS. However, this locus contains multiple protein-coding genes with several brain cis-eQTLs  
410 affecting them and other genes in the region (Table S5). The analysis of this large locus is highly  
411 challenging. The locus has previously been mapped to brain morphology (2) and several  
412 neurodegenerative diseases such as progressive supranuclear palsy, corticobasal degeneration,  
413 frontotemporal dementia, Parkinson's disease, and Alzheimer's disease (AD) (42, 43, 53–62).  
414 Moreover, variations in cortical morphology have recently been linked to *APOE*  $\epsilon$ 4 and *MAPT* in  
415 young healthy adults (63). There is also evidence of brain stem deformations in early stages of  
416 AD manifesting as variations in the midbrain (64), decreased locus coeruleus (part of the brain  
417 stem) volume preceding neuronal loss (65), and neurofibrillary tangle-related neurodegeneration  
418 in the brain stem potentially causing neuropsychiatric symptoms (66). While patients with  
419 diagnosed neurodegeneration were excluded from our study, the possibility remains that  
420 preclinical stages might potentially mediate the genetic relation between shape and the *MAPT*  
421 locus. However, neither gene enrichment analysis (Fig. 4 and 5) nor Canonical Correlation  
422 Analysis (CCA, Fig. 6), as an enrichment analysis independent of candidate genes, did provide  
423 evidence for a significant correlation between the genetics or phenotype of brain stem LBS and  
424 the genetics, respectively the PRS, of neurodegeneration such as AD.

425 At this locus, significant ExNS SNPs with high CADD scores were also found in  
426 *SPPL2C*, *KANSL1* and *CRHRI*, which showed the strongest signal in the MAGMA analysis  
427 (Table 1, Fig. 4A). Loss-of-function variants of *KANSL1* are known for causing autosomal-  
428 dominant Koolen-de-Vries syndrome (MIM #610443) which is characterized by intellectual  
429 disability and structural brain abnormalities (67). *SPPL2C* is the gene of signal peptide peptidase-  
430 like 2C and has previously been highlighted in a GWAS on total brain volume due to a relatively  
431 large number of ExNS (1). However, we controlled for volume in our GWAS of brain shape. A  
432 recent study found that *CRHRI*, which encodes a receptor for the corticotropin-releasing hormone  
433 CRH, moderates brain volume differences, possibly through its stress response function, which in  
434 return mediates the relationship between urban environmental exposure and affective symptoms  
435 (68). Especially, in the context of *CRHRI*, lower brain volume was observed in relation to  
436 stronger affective symptoms and greater urban environment exposure. Variants of *CRHRI*, have  
437 further been associated with alcohol (69) and heavy alcohol consumption following stressful life  
438 (70). Even light alcohol consumption has recently been related to changes in brain structure (71).  
439 Indeed, genes associated with the LBS of several other brain structures were enriched in gene sets  
440 associated with alcohol consumption (Fig. 5A, Fig. S4-S5). Thus, alcohol consumption may be a  
441 potential mediator of their effect on brain shape. However, we would like to note that the  
442 enrichment was driven by one locus.

443 That locus on chromosome 4 with lead SNP rs13107325, an ExNS variant of *SLC39A8*,  
444 appeared not only to be significant in most brain structures (15 structures including the brain  
445 stem, albeit with subthreshold significance) but also revealed the overall strongest signal across  
446 all the GWASs in left cerebellum white matter. This locus, especially the lead SNP, has a  
447 pleiotropic effect. Besides alcohol consumption (72), it has been linked to schizophrenia (SCZ)  
448 (34–36), Crohn's disease (37), blood pressure and cardiovascular disease risk (38), and several  
449 brain imaging phenotypes (9). The cerebellothalamic and cerebellar-basal ganglia connectivity  
450 dysfunction hypothesis in individuals with SCZ is supported by the significant and prominent

451 occurrence of rs13107325 in precisely these regions (73, 74). SCZ is known to be associated with  
452 abnormalities of subcortical brain structures (75–77). Clinical features of SCZ might be due to  
453 aberration of dendritic spine density (78). A knock-in mouse model of rs13107325 points to an  
454 increased risk of SCZ by regulating zinc transport and dendritic spine density and subtle effects  
455 on cortical development due to this variant (79). A recent gene-mapping study concluded strong  
456 evidence for pleiotropic genes associated with SCZ and brain structure with evidence of brain  
457 variation causing SCZ (80).

458 SCZ shows substantial genetic correlation (0.68) with bipolar disorder (BD) (81) which  
459 was also evident in the correlation (0.37) between their PRSs. However, BD seems to have less  
460 relation to brain morphology. Madre et al. (82) investigated cortical morphology in individuals  
461 with SCZ and BD and reported shared volume and thickness deficits while abnormalities of  
462 geometry and curvature were specific to SCZ. Also, Stauffer et al. reported the association of  
463 MRI metrics to be weaker with BD genetics than with SCZ genetics (80). Our results are in line  
464 with these findings as CCA revealed correlation of the LBS of several brain structures only with  
465 the SCZ-PRS while there was no correlation with BD-PRS (Fig. 6). This result suggests that LBS  
466 may therefore be sensitive to SCZ-specific brain shape variations and thus potentially helpful for  
467 the differential diagnosis of psychosis.

468 CCA also revealed highly significant links between the LBS of multiple brain structures  
469 and the PRS of ischemic stroke (ISS) in our healthy cohort (Fig. 6). In line with the high  
470 correlation between ISS-PRS and hypertension (HT) PRS, CCA produced a very similar result for  
471 the HT-PRS (Fig. S9). HT is associated with white matter hyperintensities and cognitive  
472 dysfunction in elderly patients and is a major risk factor for ISS (83). A recent study showed that  
473 morphological changes in the basal ganglia and thalamus already occurring in mid-life are  
474 associated with blood pressure and, therefore, might be better markers of early HT than volume  
475 aberrations (84). Our CCA results were especially significant in these brain regions, which in turn  
476 support the suggestion of using brain morphology or shape as an early biomarker of HT.

477 Limitations of our study include the lack of effect sizes (beta values) in our multivariate  
478 results, which impedes the use of conventional post-GWAS tools such as genetic correlation and  
479 Mendelian randomization analyses. Instead, we explored the relationship to genetics of other  
480 traits by performing CCA between LBSs and PRSs. This was limited by the predictive power of  
481 each PRS. Furthermore, we cannot establish causal relationship between genetic variation in brain  
482 morphology and a particular trait or disease. Restricting our study to healthy individuals may  
483 additionally have yielded lower effect sizes and potentially false negative correlations when  
484 performing disease-related analyses. A follow-up of our findings, therefore, provides avenues for  
485 future research.

486 In summary, we have provided the first delineation of the genetic architecture of brain  
487 shapes beyond global measurements such as volume and surface area by using the Laplace-  
488 Beltrami spectrum as a mathematical shape descriptor. In our multivariate GWAS on a large  
489 healthy cohort of the UK Biobank, we identified 80 unique independent SNPs with brain stem  
490 showing a distinctly high number of specific association signals which included the *MAPT* locus  
491 implicated in neurodegenerative diseases. The shapes of most brain structures were significantly  
492 associated with the pleiotropic variant rs13107325, a known risk factor for schizophrenia. We  
493 further identified significant correlations between brain shape and polygenic risk scores of  
494 schizophrenia, hypertension and ischemic stroke, suggesting the potential use of the LBS as an  
495 early disease biomarker. As such, the LBS expands the set of tools for investigating brain shapes,  
496 holding implications for early detection of a wide spectrum of traits and warrants further research  
497 in disease-specific cohorts.

## 498 **Materials and Methods**

### 499 **UKB Data and Sample Filtering**

500 Data was retrieved from the official source of the [UK Biobank](#) (application number 41655) and  
501 provided as a DataLad dataset, a research data management solution providing data versioning,  
502 data transport, and provenance capture (85). A total of 487,409 genotyped samples were available  
503 (v3 imputed on Haplotype Reference Consortium and UK10K haplotype data, aligned to the +  
504 strand of the reference and GRCh37 coordinates, released in 2018, data field 22828). We kept  
505 only self-reported White-British individuals for data homogeneity according to data field 21000,  
506 resulting in 430,560 individuals. After genetic quality control (QC, see below), there were  
507 393,913 unrelated samples left. 30,080 of them had structural MRI data (T1) on which we  
508 calculated the LBS (see below) of 22 brain structures (Fig. 1) of 24,834 individuals without  
509 mental or behavioral disorders (ICD index F) or diseases of the nervous system (ICD index G)  
510 according to the International Statistical Classification of Diseases and Related Health Problems  
511 10th revision (ICD-10).

512 We created age and sex-stratified discovery and replication samples by splitting the data into 2  
513 subsets comprising 80% and 20% of the individuals, respectively. Excluding samples without  
514 total brain volume data (see below), our final data set for our discovery GWAS contained 19,862  
515 individuals, 9435 male and 10,427 female, ranging in age between 46.0 and 81.7 years with a  
516 mean $\pm$ SD of 64.3 $\pm$ 7.4 years (female: 63.6 $\pm$ 7.3, male: 65.0 $\pm$ 7.5).  
517  
518

### 519 **Quality Control of Genetic Data**

520 We conducted QC using whenever possible Plink2 (86) and Plink (v1.9) for some missing  
521 functionalities on all self-reported White-British individuals and their imputed genotype data,  
522 which was initially converted from BGEN to binary Plink2 format, and kept only single-  
523 nucleotide polymorphisms (SNPs). As recommended by UK Biobank (87), we removed variants  
524 with an imputation score less than 0.3, and following Mills et al. (88), we excluded all variants  
525 with a call rate less than 0.95, a minor allele frequency of less than 0.01 and a Hardy-Weinberg  
526 equilibrium exact test p-value below 1E-6. As recommended by Plink2, we used the mid-p  
527 adjustment to reduce the filter's tendency to retain variants with missing data (89) and the *keep-*  
528 *fewhet* modifier. We also removed samples with a mismatch between self-reported and  
529 genetically inferred sex, with genotype missingness of more than 0.05, and all heterozygosity  
530 outliers ( $\pm 3$  SD). Moreover, using a kinship coefficient of 0.088 and the *king-cutoff* command,  
531 we randomly excluded one from each pair of individuals related to  $\geq 2$ nd degree. Only autosomal  
532 SNPs were examined. In total 8,105,763 SNPs remained after QC. We calculated the first 10  
533 principal components (PC) from them, which were included as covariates in the GWASs.  
534  
535  
536

### 537 **Image Data Processing**

538 First, we segmented anatomical structures from all available T1 MRI brain scans with FreeSurfer  
539 version 7.2.0 (90–94). Second, we created triangular meshes for all structures of interest. Finally,  
540 we computed compact shape representations for all structures, using the BrainPrint Python  
541 package (21) (see below). To account for the quality of the MRI scans, we computed the Euler  
542 number with FreeSurfer. This represents the total defect index and is a measurement of the  
543 number of holes in the calculated surface.  
544  
545  
546

## 547 **Multidimensional Shape Descriptor**

548  
549 A shape, parametrized as a Riemannian manifold  $M$ , may be described by its intrinsic geometric  
550 information, which can be obtained by solving the Helmholtz equation on that manifold:

$$551 \Delta f = -\lambda f,$$

552  
553 where  $\Delta$  is the Laplace-Beltrami operator, a generalization of the Laplace operator in Euclidean  
554 space, and  $f$  a real-valued function, with  $f \in C^2$ , defined on  $M$ . The solutions  $(f_i, \lambda_i)$  represent  
555 the spatial part of the wave equation with eigenfunctions  $f_i$  and eigenvalues  $\lambda_i$  where  $\sqrt{\lambda_i}$  can be  
556 interpreted as the natural frequencies. The set of all eigenvalues is called the spectrum of an  
557 operator. The LBS or Shape-DNA (13) is accordingly defined as the beginning subsequence of  
558 the increasingly ordered spectrum of the Laplace-Beltrami operator solved on a Riemannian  
559 manifold:

$$560 \{\lambda_1, \dots, \lambda_N\} \text{ with } 0 \leq \lambda_i \leq \lambda_j \quad \forall i < j.$$

561  
562 The LBS was computed with the BrainPrint package (21) based on the FreeSurfer output. For  
563 each individual, we calculated the first, i.e., the smallest, 50 eigenvalues of each brain structure as  
564 done in (6). Because the first eigenvalue is always zero, since each object is a closed surface  
565 without boundary, we used only the next 49 values in our analyses. Each eigenvalue  $\lambda_{i,m}$  was  
566 further normalized to volume  $V_i$  of each brain structure  $i$ . Volume and surface area were  
567 calculated by BrainPrint. Afterwards  $\lambda_{i,m}$  was divided by its position  $m$  in the ordered spectrum  
568 to balance out the higher eigenvalues which more likely represent noise (6, 13, 21):

$$569 \bar{\lambda}_{i,m} = \frac{1}{m} (\lambda_{i,m} \cdot V_i^{\frac{2}{3}}), \forall i \in \{1, \dots, 22\}, m \in \{2, \dots, 50\}$$

570  
571 In the end, we analyzed 22 brain structures as provided by FreeSurfer: 4th ventricle, brain stem,  
572 accumbens area (left and right), amygdala (left and right), caudate (left and right), cerebellum  
573 cortex (left and right), cerebellum white matter (left and right), hippocampus (left and right),  
574 pallidum (left and right), putamen (left and right), thalamus proper (left and right), ventral  
575 diencephalon (DC) (left and right). By that, we handled the normalized and reweighted LBS  
576  $\{\bar{\lambda}_{i,2}, \dots, \bar{\lambda}_{i,50}\}$  for each brain structure  $i$  as a 49-dimensional quantitative trait.

## 577 **Multivariate Genome-wide Association Analysis**

578  
579 For our multivariate GWAS, we used the MOSTest tool, a multivariate omnibus test, which  
580 handles big data efficiently and accounts for the correlation among the phenotypes to increase  
581 statistical power (2). Since the eigenvalues are not independent in general (Pearson correlation  
582 range: [0.285;0.998], mean $\pm$ SD 0.93 $\pm$ 0.06, Fig. S10-S12), we conducted, for each brain structure  
583  $i$ , a multivariate GWAS on the 49 volume-normalized and scaled eigenvalues  $\bar{\lambda}_{i,m}$ ,  $m \in$   
584  $\{2, \dots, 50\}$ , treating each  $\bar{\lambda}_{i,m}$  as a single quantitative phenotype. For that, we first calculated  
585 residuals of the multidimensional phenotype to control for potential covariates as recommended  
586 by MOSTest, i.e., we regressed each  $\bar{\lambda}_{i,m}$  on age, age<sup>2</sup>, sex, first 10 genetic principal components  
587 (PCs), Euler number, surface area of each brain structure  $i$  and the total brain volume. The latter  
588 was calculated as the sum of the volume of ventricular cerebrospinal fluid (data field 25004) and  
589 the gray and white matter volume (data field 25010) in line with Jansen et al. (1). Normalizing the  
590 LBS to volume as described above and regressing out total brain volume and surface area of each  
591  
592  
593  
594



595 brain structure assured that we indeed studied the shape and not linear size effects. We defined the  
596 residualized eigenvalues  $\tilde{\lambda}_{i,m}$  as the sum of the estimated intercept and the residuals of its linear  
597 regression. After adjusting for covariates, the range of absolute correlations between all  $\tilde{\lambda}_{i,m}$  was  
598 quite high (Pearson correlation range: [0;0.978], mean $\pm$ SD 0.65 $\pm$ 0.18, Fig. S10-S12). We further  
599 inspected the relation of each  $\tilde{\lambda}_{i,m}$  to volume and surface area by calculating their Pearson  
600 correlations. There was, as expected, no correlation with surface area and a low correlation with  
601 volume (average  $r = 0.28$ ) (Fig. S13). The effect was small except for the eigenvalues of caudate,  
602 which showed a mean correlation of 0.50 (left) and 0.45 (right), likely relating to the long C-  
603 shaped form of that structure and by the fact that volume normalization (i.e. multiplication with  
604  $V_i^{\frac{2}{3}}$ , see above) excludes the pure size effects but not a real difference in shape. Including volume  
605 as additional covariate in the MOSTest analysis produced nevertheless similar results (Table  
606 S17).

607 All  $\tilde{\lambda}_{i,m}$  were then passed to MOSTest, which first performs a rank-based inverse-normal  
608 transformation (INT) to obtain normally distributed data. This is followed by a standard additive  
609 univariate GWAS for each  $\tilde{\lambda}_{i,m}$ , resulting in z-scores for each SNP and  $\tilde{\lambda}_{i,m}$ . This procedure is  
610 repeated with once-permuted genotypes, preserving phenotype correlation. The MOSTest test  
611 statistic for a SNP is then calculated as the Mahalanobis norm of the non-permuted z-scores of  
612 that SNP and the correlation matrix  $R$  of the z-scores from once-permuted genotypes of all  
613 eigenvalues. The p-value of the multivariate test statistic is then calculated from a cumulative  
614 distribution function of a fitted gamma distribution, which eliminates the need for a multiple  
615 testing correction of 49 univariate GWASs and therefore allows to determine significance of  
616 SNPs with a p-value below the standard genome-wide threshold of 5E-8. We further confirmed  
617 that MOSTest controlled the type-I error sufficiently by plotting p-values from empirical  
618 distributions of the test statistic and from fitted gamma functions under the null hypothesis as  
619 calculated by permutating the phenotype-genotype assignments (Fig. S14-S35).

## 620 621 **Identification of Genomic Loci and Functional Annotations**

622  
623 For functional annotations, we used the web-based platform FUMA (v1.5.6) (29). We used  
624 default settings to determine genomic risk loci. First, independent significant SNPs were  
625 identified as the ones with p-value equal to or smaller than 2.27E-9 (Bonferroni correction for 22  
626 brain structures 5E-8 / 22 = 2.27E-9) and linkage disequilibrium (LD) with other such SNPs in its  
627 vicinity of  $r^2 < 0.6$ . These SNPs and those in LD with them ( $r^2 \geq 0.6$ ) were defined as  
628 candidate SNPs and used in subsequent analyses. LD computation was based on the European  
629 population within the 1000 genomes reference panel (phase 3) (95). Those with  $r^2 < 0.1$  were  
630 classified as lead SNPs among the independent significant SNPs. Independent significant SNPs  
631 with  $r^2 \geq 0.1$ , or with a gap of less than 250 kb between their respective LD blocks (all SNPs in  
632 LD  $r^2 \geq 0.6$  with them) were merged into one genomic risk locus. Therefore, a genomic risk  
633 locus can contain multiple independent significant SNPs.

634 Candidate SNPs were used for functional annotations. Positional annotation was performed with  
635 ANNOVAR (30). Further, SNPs were annotated with CADD scores, RegulomeDB scores, and  
636 15-core chromatin states. The major histocompatibility (MHC) region was excluded from all  
637 annotations. For eQTL mapping, we checked several available databases containing relevant  
638 information, i.e., PsychENCODE eQTLs, ComminMind Consortium, BRAINEAC, and GTEx v8  
639 Brain, and extracted all significant SNP-gene pairs with a False Discovery Rate (FDR, Benjamini-  
640 Hochberg procedure(46)) controlled p-value  $< 0.05$  within the respective database.

641  
642



## 643 Gene-mapping and Gene-enrichment Analysis

644  
645 For gene prioritization, we used PoPS (v 0.2) (44), a tool that assigns polygenic priority scores to  
646 each gene by fitting their MAGMA z-scores by trait-relevant gene features extracted from cell-  
647 type-specific gene expression, biological pathways and protein-protein interactions. We  
648 calculated these z-scores using MAGMA (v 1.10) (41) by first annotating SNPs to 18,383 protein-  
649 coding genes within a 0kb window and afterwards performing gene analysis using the SNP-wise  
650 mean model and the European population of 1000 Genomes as reference dataset for every brain  
651 structure. We then ran PoPS on our MAGMA scores using default settings and all available  
652 57,543 gene features. Gene annotation and location files, as well as gene features, were taken  
653 from <https://www.finucanelab.org/data>.

654 Lead SNPs, as defined by FUMA (see above), were mapped to genes within a 500kb window up-  
655 and downstream. We first selected the four genes with the highest PoP score in each locus.

656 Second, since it was shown that PoPS works best when combined with orthogonal methods like  
657 Nearest Gene, we mapped each lead SNP to the two closest genes. After assigning a rank to each  
658 gene by both methods and averaging the two ranks, we reranked the genes and finally prioritized  
659 all genes with average rank  $\leq 2$  for each independent significant SNP.

660 The prioritized genes were given as input to FUMAs Gene2Func tool. Genes of brain structures  
661 present in both hemispheres were joined in each analysis. We used all protein-coding genes of  
662 Ensembl v110. Hypergeometric tests analyzed the overrepresentation of mapped genes in  
663 precalculated gene sets followed by an FDR control (Benjamini-Hochberg,  $p < 0.05$ ) within each  
664 category.

## 666 Canonical Correlation Analysis with PRS

667  
668 For the canonical correlation analysis (CCA), we extracted PRS of 6 brain shape-related traits and  
669 disorders and of one trait that stood out from the FUMA gene-set results. 6 PRS were taken from  
670 the UK Biobank which have exclusively been trained on external data sets: Alzheimer's disease  
671 (data field 26206), bipolar disorder (data field 26214), ischemic stroke (data field 26248),  
672 multiple sclerosis (data field 26254), Parkinson's disease (data field 26260) and schizophrenia  
673 (data field 26275). Further, we calculated the PRS for alcohol use disorder based on the score  
674 definition from the PGScatalog (96) (PGS002738 (97)). UK Biobank data was not used for  
675 training in this last score but for one GWAS in the discovery meta-analysis of the alcohol use  
676 disorder study. The data was available for 19850 samples. Each PRS was first linearly regressed  
677 on age, age<sup>2</sup>, sex, first 10 genetic principal components (PCs), and total brain volume. The  
678 residuals were added to the fitted intercept. Second, a rank-based INT was applied to those  
679 PRS. The partial correlation between the PRS was calculated as a Pearson correlation. We used  
680 the residualized eigenvalues  $\tilde{\lambda}_{i,m}$  as they were used as input for MOSTest for each brain structure  
681 and applied a rank-based INT.

682 For each pair of PRS and brain structure, we conducted a CCA using the `cca()` function within the  
683 "yacca" R-package (version 1.4-2) (98). CCA finds a linear combination of all eigenvalues, a so-  
684 called canonical variable, which correlates maximally with the PRS. All resulting p-values of the  
685 correlations were adjusted for multiple testing using FDR. Afterwards, we applied an additional  
686 Bonferroni correction for 6 effective PRS, which we consider as the two-level correction. For  
687 comparison, we also calculated the Bonferroni correction for 22\*6 tests. All adjustments were  
688 made to the 0.05 significance threshold.

689 Further, in each CCA, we investigated the loadings, i.e. the correlations of all eigenvalues with  
690 their canonical variable, which describe the direction and strength of the impact of each  
691 eigenvalue on the risk score. Out of those, we calculated the mean loading and the number of  
692 negative/positive loadings of all eigenvalues in each brain structure and PRS. If at least 90% of all

693 loadings had the same direction, we deemed that as a common direction of effects. Hierarchical  
694 clusters were computed on the distances of mean loadings among brain structures and PRS,  
695 respectively, using the complete linkage method (Fig. S7).

## 696 SNP-based Heritability

697 Ge et al. investigated the heritability of neuroanatomical shape using the LBS. For estimating its  
698 SNP-heritability, they proposed a multidimensional approach where they summed the univariate  
699 heritability  $h_m^2$  of the eigenvalues, each weighted by  $\gamma_m$ , the relative size of its phenotypic  
700 variance:  
701  
702

$$703 h^2 = \sum_m \gamma_m h_m^2, \text{ with } \gamma_m = \frac{\sigma_{P_m}^2}{\sum_k \sigma_{P_k}^2},$$

704 and  $\sigma_{P_m}^2$  being the phenotypic variance of trait  $m$ . The univariate heritabilities of the 49  
705 eigenvalues were derived using SCORE. For combined structures, we derived the  
706 multidimensional heritability from the union set of eigenvalues. When applying SCORE, we  
707 proceeded as with the GWAS described above, using volume-normalized and reweighted  
708 eigenvalues and the same set of covariates. The phenotypic variance was also computed using the  
709 residualized eigenvalues  $\tilde{\lambda}_{i,m}$ . We further calculated the p-value of each heritability using the  
710 Wald test statistics, which is distributed as  
711  
712

$$713 \left( \frac{h^2}{SE(h^2)} \right)^2 \sim \frac{1}{2} \chi_0^2 + \frac{1}{2} \chi_1^2$$

714 With  $\chi_0^2$  being the point mass at 0 and  $\chi_1^2$  the chi-squared distribution with one degree of freedom  
715 since the null hypothesis  $H_0: h^2 = 0$  lies on the boundary of a constrained parameter space ( $h^2 \geq$   
716 0) (99). The standard error (SE) of each multidimensional heritability was calculated using  
717 Bienayme's identity for the variance of a sum and the univariate estimates from SCORE as  
718 follows:  
719  
720

$$721 SE(h^2) = \sqrt{\sum_m \gamma_m^2 SE(h_m^2)^2}.$$

722 For testing the difference between heritability values in each combined brain structure, we  
723 utilized the Wald test statistics distributed as  
724  
725

$$726 \left( \frac{h^2 - h_{G_e}^2}{SE(h^2 - h_{G_e}^2)} \right)^2 \sim \chi_1^2,$$

727 with

$$728 SE(h^2 - h_{G_e}^2)^2 = SE(h^2)^2 + SE(h_{G_e}^2)^2 - SE(h^2)SE(h_{G_e}^2)cor(h^2, h_{G_e}^2).$$

729 Since  $SE(h^2)$  is small in comparison to  $SE(h_{G_e}^2)$ , we can approximate  $SE(h^2 - h_{G_e}^2)^2$  by just  
730  $SE(h_{G_e}^2)^2$ .  
731  
732

## 737 **Replication**

738  
739 Replication analysis was conducted on the 20% sample (see above). This encompassed 4963  
740 individuals, of which 4961 (2605 female) had data of total brain volume available, ranging in age  
741 from 45.2 to 81.8 years (age mean $\pm$ SD: 64.2 $\pm$ 7.4, female: 63.6 $\pm$ 7.2, male: 64.9 $\pm$ 7.6). We used  
742 the same procedure and set of covariates to perform MOSTest analyses for each brain structure on  
743 this dataset and all SNPs passing QC. For each brain structure, we only investigated those variants  
744 of the 80 independent SNPs which had shown Bonferroni corrected genome-wide significance in  
745 the respective discovery GWAS. FDR correction was applied to these p-values for each brain  
746 structure separately.

747  
748  
749

## References

1. P. R. Jansen, M. Nagel, K. Watanabe, Y. Wei, J. E. Savage, C. A. De Leeuw, M. P. Van Den Heuvel, S. Van Der Sluis, D. Posthuma, Genome-wide meta-analysis of brain volume identifies genomic loci and genes shared with intelligence. *Nat Commun* **11**, 5606 (2020).
2. D. Van Der Meer, O. Frei, T. Kaufmann, A. A. Shadrin, A. Devor, O. B. Smeland, W. K. Thompson, C. C. Fan, D. Holland, L. T. Westlye, O. A. Andreassen, A. M. Dale, Understanding the genetic determinants of the brain with MOSTest. *Nat Commun* **11**, 3512 (2020).
3. D. P. Hibar, J. L. Stein, M. E. Renteria, A. Arias-Vasquez, S. Desrivieres, N. Jahanshad, R. Toro, K. Wittfeld, L. Abramovic, M. Andersson, B. S. Aribisala, N. J. Armstrong, M. Bernard, M. M. Bohlken, M. P. Boks, J. Bralten, A. A. Brown, M. Mallar Chakravarty, Q. Chen, C. R. K. Ching, G. Cuellar-Partida, A. den Braber, S. Giddaluru, A. L. Goldman, O. Grimm, T. Guadalupe, J. Hass, G. Woldehawariat, A. J. Holmes, M. Hoogman, D. Janowitz, T. Jia, S. Kim, M. Klein, B. Kraemer, P. H. Lee, L. M. Olde Loohuis, M. Luciano, C. Macare, K. A. Mather, M. Mattheisen, Y. Milanese, K. Nho, M. Pampmeyer, A. Ramasamy, S. L. Risacher, R. Roiz-Santiañez, E. J. Rose, A. Salami, P. G. Sämann, L. Schmaal, A. J. Schork, J. Shin, L. T. Strike, A. Teumer, M. M. J. van Donkelaar, K. R. van Eijk, R. K. Walters, L. T. Westlye, C. D. Whelan, A. M. Winkler, M. P. Zwiers, S. Alhusaini, L. Athanasiu, S. Ehrlich, M. M. H. Hakobjan, C. B. Hartberg, U. K. Haukvik, A. J. G. A. M. Heister, D. Hoehn, D. Kasperaviciute, D. C. M. Liewald, L. M. Lopez, R. R. R. Makkinje, M. Matarin, M. A. M. Naber, D. Reese McKay, M. Needham, A. C. Nugent, B. Pütz, N. A. Royle, L. Shen, E. Sprooten, D. Trabzuni, S. S. L. van der Marel, K. J. E. van Hulzen, E. Walton, C. Wolf, L. Almasy, D. Ames, S. Arepalli, A. A. Assareh, M. E. Bastin, H. Brodaty, K. B. Bulayeva, M. A. Carless, S. Cichon, A. Corvin, J. E. Curran, M. Czisch, G. I. de Zubicaray, A. Dillman, R. Duggirala, T. D. Dyer, S. Erk, I. O. Fedko, L. Ferrucci, T. M. Foroud, P. T. Fox, M. Fukunaga, J. Raphael Gibbs, H. H. H. Göring, R. C. Green, S. Guelfi, N. K. Hansell, C. A. Hartman, K. Hegenscheid, A. Heinz, D. G. Hernandez, D. J. Heslenfeld, P. J. Hoekstra, F. Holsboer, G. Homuth, J.-J. Hottenga, M. Ikeda, C. R. Jack, M. Jenkinson, R. Johnson, R. Kanai, M. Keil, J. W. Kent, P. Kochunov, J. B. Kwok, S. M. Lawrie, X. Liu, D. L. Longo, K. L. McMahon, E. Meisenzahl, I. Melle, S. Mohnke, G. W. Montgomery, J. C. Mostert, T. W. Mühleisen, M. A. Nalls, T. E. Nichols, L. G. Nilsson, M. M. Nöthen, K. Ohi, R. L. Olvera, R. Perez-Iglesias, G. Bruce Pike, S. G. Potkin, I. Reinvang, S. Reppermund, M. Rietschel, N. Romanczuk-Seiferth, G. D. Rosen, D. Rujescu, K. Schnell, P. R. Schofield, C. Smith, V. M. Steen, J. E. Sussmann, A. Thalamuthu, A. W. Toga, B. J. Traynor, J. Troncoso, J. A. Turner, M. C. Valdés Hernández, D. van 't Ent, M. van der Brug, N. J. A. van der Wee, M.-J. van Tol, D. J. Veltman, T. H. Wassink, E. Westman, R. H. Zielke, A. B. Zonderman, D. G. Ashbrook, R. Hager, L. Lu, F. J. McMahon, D. W. Morris, R. W. Williams, H. G. Brunner, R. L. Buckner, J. K. Buitelaar, W. Cahn, V. D. Calhoun, G. L. Cavalleri, B. Crespo-Facorro, A. M. Dale, G. E. Davies, N. Delanty, C. Depondt, S. Djurovic, W. C. Drevets, T. Espeseth, R. L. Gollub, B.-C. Ho, W. Hoffmann, N. Hosten, R. S. Kahn, S. Le Hellard, A. Meyer-Lindenberg, B. Müller-Myhsok, M. Nauck, L. Nyberg, M. Pandolfo, B. W. J. H. Penninx, J. L. Roffman, S. M. Sisodiya, J. W. Smoller, H. van Bokhoven, N. E. M. van Haren, H. Völzke, H. Walter, M. W. Weiner, W. Wen, T. White, I. Agartz, O. A. Andreassen, J. Blangero, D. I. Boomsma, R. M. Brouwer, D. M. Cannon, M. R. Cookson, E. J. C. de Geus, I. J. Deary, G. Donohoe, G. Fernández, S. E. Fisher, C. Francks, D. C. Glahn, H. J. Grabe, O. Gruber, J. Hardy, R. Hashimoto, H. E. Hulshoff Pol, E. G. Jönsson, I. Kloszewska, S. Lovestone, V. S. Mattay, P. Mecocci, C. McDonald, A. M. McIntosh, R. A. Ophoff, T. Paus, Z. Pausova, M. Ryten, P. S. Sachdev, A. J. Saykin, A. Simmons, A. Singleton, H. Soininen, J. M. Wardlaw, M. E. Weale, D. R. Weinberger, H. H. H. Adams, L. J. Launer, S. Seiler, R. Schmidt, G. Chauhan, C. L. Satizabal, J. T. Becker, L. Yanek, S. J. van der Lee, M. Ebling, B. Fischl, W. T. Longstreth, D. Greve, H. Schmidt, P. Nyquist, L. N. Vinke, C. M. van Duijn, L. Xue, B. Mazoyer, J. C. Bis, V. Gudnason, S. Seshadri, M. A. Ikram, N. G. Martin, M. J. Wright, G. Schumann, B. Franke, P. M. Thompson, S. E. Medland, Common genetic variants influence human subcortical brain structures. *Nature* **520**, 224–229 (2015).
4. C. L. Satizabal, H. H. H. Adams, D. P. Hibar, C. C. White, M. J. Knol, J. L. Stein, M. Scholz, M. Sargurupremraj, N. Jahanshad, G. V. Roshchupkin, A. V. Smith, J. C. Bis, X. Jian, M. Luciano, E. Hofer, A. Teumer, S. J. Van Der Lee, J. Yang, L. R. Yanek, T. V. Lee, S. Li, Y. Hu, J. Y. Koh, J. D. Eicher, S. Desrivieres, A. Arias-Vasquez, G. Chauhan, L. Athanasiu, M. E. Renteria, S. Kim, D. Hoehn, N. J. Armstrong, Q. Chen, A. J. Holmes, A. Den Braber, I. Kloszewska, M. Andersson, T. Espeseth, O. Grimm, L. Abramovic, S. Alhusaini, Y. Milanese, M. Pampmeyer, T. Axelsson, S. Ehrlich, R. Roiz-Santiañez, B. Kraemer, A. K. Häberg, H. J. Jones, G. B. Pike, D. J. Stein, A. Stevens, J. Bralten, M. W. Vernooij, T. B. Harris, I. Filippi, A. V. Witte, T. Guadalupe, K. Wittfeld, T. H. Mosley, J. T. Becker, N. T. Doan, S. P. Hagenaars, Y. Saba, G. Cuellar-Partida, N. Amin, S. Hilal, K. Nho, N. Mirza-Schreiber, K. Arfanakis, D. M. Becker, D. M. Ames, A. L. Goldman, P. H. Lee, D. I. Boomsma, S. Lovestone, S. Giddaluru, S. Le Hellard, M. Mattheisen, M. M. Bohlken, D. Kasperaviciute, L. Schmaal, S. M. Lawrie, I. Agartz, E. Walton, D. Tordesillas-Gutierrez, G. E. Davies, J. Shin, J. C. Ipser, L. N. Vinke, M. Hoogman, T. Jia, R. Burkhardt, M. Klein, F. Crivello, D. Janowitz, O. Carmichael, U. K. Haukvik, B. S. Aribisala, H. Schmidt, L. T. Strike, C.-Y. Cheng, S. L. Risacher, B. Pütz, D. A. Fleischman, A. A. Assareh, V. S. Mattay, R. L. Buckner, P. Mecocci, A. M. Dale, S. Cichon, M. P. Boks, M. Matarin, B. W. J. H. Penninx, V. D. Calhoun, M. M. Chakravarty, A. F. Marquand, C. Macare, S. Kharabian Masouleh, J. Oosterlaan, P. Amouyel, K. Hegenscheid, J. I. Rotter, A. J. Schork, D. C. M.

- 810 Liewald, G. I. De Zubicaray, T. Y. Wong, L. Shen, P. G. Sämann, H. Brodaty, J. L. Roffman, E. J. C. De Geus, M.  
811 Tsolaki, S. Erk, K. R. Van Eijk, G. L. Cavalleri, N. J. A. Van Der Wee, A. M. McIntosh, R. L. Gollub, K. B.  
812 Bulayeva, M. Bernard, J. S. Richards, J. J. Himali, M. Loeffler, N. Rommelse, W. Hoffmann, L. T. Westlye, M. C.  
813 Valdés Hernández, N. K. Hansell, T. G. M. Van Erp, C. Wolf, J. B. J. Kwok, B. Vellas, A. Heinz, L. M. Olde  
814 Loohuis, N. Delanty, B.-C. Ho, C. R. K. Ching, E. Shumskaya, B. Singh, A. Hofman, D. Van Der Meer, G. Homuth,  
815 B. M. Psaty, M. E. Bastin, G. W. Montgomery, T. M. Foroud, S. Reppermund, J.-J. Hottenga, A. Simmons, A.  
816 Meyer-Lindenberg, W. Cahn, C. D. Whelan, M. M. J. Van Donkelaar, Q. Yang, N. Hosten, R. C. Green, A.  
817 Thalamuthu, S. Mohnke, H. E. Hulshoff Pol, H. Lin, C. R. Jack, P. R. Schofield, T. W. Mühleisen, P. Maillard, S. G.  
818 Potkin, W. Wen, E. Fletcher, A. W. Toga, O. Gruber, M. Huentelman, G. Davey Smith, L. J. Launer, L. Nyberg, E.  
819 G. Jönsson, B. Crespo-Facorro, N. Koen, D. N. Greve, A. G. Uitterlinden, D. R. Weinberger, V. M. Steen, I. O.  
820 Fedko, N. A. Groenewold, W. J. Niessen, R. Toro, C. Tzourio, W. T. Longstreth, M. K. Ikram, J. W. Smoller, M.-J.  
821 Van Tol, J. E. Sussmann, T. Paus, H. Lemaitre, M. L. Schroeter, B. Mazoyer, O. A. Andreassen, F. Holsboer, C.  
822 Depondt, D. J. Veltman, J. A. Turner, Z. Pausova, G. Schumann, D. Van Rooij, S. Djurovic, I. J. Deary, K. L.  
823 McMahan, B. Müller-Myhsok, R. M. Brouwer, H. Soininen, M. Pandolfo, T. H. Wassink, J. W. Cheung, T. Wolfers,  
824 J.-L. Martinot, M. P. Zwiers, M. Nauck, I. Melle, N. G. Martin, R. Kanai, E. Westman, R. S. Kahn, S. M. Sisodiya, T.  
825 White, A. Saremi, H. Van Bokhoven, H. G. Brunner, H. Völzke, M. J. Wright, D. Van 'T Ent, M. M. Nöthen, R. A.  
826 Ophoff, J. K. Buitelaar, G. Fernández, P. S. Sachdev, M. Rietschel, N. E. M. Van Haren, S. E. Fisher, A. S. Beiser, C.  
827 Francks, A. J. Saykin, K. A. Mather, N. Romanczuk-Seiferth, C. A. Hartman, A. L. DeStefano, D. J. Heslenfeld, M.  
828 W. Weiner, H. Walter, P. J. Hoekstra, P. A. Nyquist, B. Franke, D. A. Bennett, H. J. Grabe, A. D. Johnson, C. Chen,  
829 C. M. Van Duijn, O. L. Lopez, M. Fornage, J. M. Wardlaw, R. Schmidt, C. DeCarli, P. L. De Jager, A. Villringer, S.  
830 Debette, V. Gudnason, S. E. Medland, J. M. Shulman, P. M. Thompson, S. Seshadri, M. A. Ikram, Genetic  
831 architecture of subcortical brain structures in 38,851 individuals. *Nat Genet* **51**, 1624–1636 (2019).  
832 5. T. Elvsåshagen, S. Bahrami, D. Van Der Meer, I. Agartz, D. Alnæs, D. M. Barch, R. Baur-Streubel, A.  
833 Bertolino, M. K. Beyer, G. Blasi, S. Borgwardt, B. Boye, J. Buitelaar, E. Bøen, E. G. Celius, S. Cervenka, A.  
834 Conzelmann, D. Coynel, P. Di Carlo, S. Djurovic, S. Eisenacher, T. Espeseth, H. Fatouros-Bergman, L. Flyckt, B.  
835 Franke, O. Frei, B. Gelao, H. F. Harbo, C. A. Hartman, A. Håberg, D. Heslenfeld, P. J. Hoekstra, E. A. Høgestøl, R.  
836 Jonassen, E. G. Jönsson, Karolinska Schizophrenia Project (KaSP) consortium, L. Farde, L. Flyckt, G. Engberg, S.  
837 Erhardt S, H. Fatouros-Bergman, S. Cervenka, L. Schwieler, F. Piehl, I. Agartz, K. Collste, P. Victorsson, A.  
838 Malmqvist, M. Hedberg, F. Orhan, C. M. Sellgren, P. Kirsch, I. Kloszewska, T. V. Lagerberg, N. I. Landrø, S. Le  
839 Hellard, K.-P. Lesch, L. A. Maglanoc, U. F. Malt, P. Mecocci, I. Melle, A. Meyer-Lindenberg, T. Moberget, J. E.  
840 Nordvik, L. Nyberg, K. S. O. Connell, J. Oosterlaan, M. Papalino, A. Papassotiropoulos, P. Pauli, G. Pergola, K.  
841 Persson, D. De Quervain, A. Reif, J. Rokicki, D. Van Rooij, A. A. Shadrin, A. Schmidt, E. Schwarz, G. Selbæk, H.  
842 Soininen, P. Sowa, V. M. Steen, M. Tsolaki, B. Vellas, L. Wang, E. Westman, G. C. Ziegler, M. Zink, O. A.  
843 Andreassen, L. T. Westlye, T. Kaufmann, The genetic architecture of human brainstem structures and their  
844 involvement in common brain disorders. *Nat Commun* **11**, 4016 (2020).  
845 6. T. Ge, M. Reuter, A. M. Winkler, A. J. Holmes, P. H. Lee, L. S. Tirrell, J. L. Roffman, R. L. Buckner, J. W.  
846 Smoller, M. R. Sabuncu, Multidimensional heritability analysis of neuroanatomical shape. *Nat Commun* **7**, 13291  
847 (2016).  
848 7. G. V. Roshchupkin, B. A. Gutman, M. W. Vernooij, N. Jahanshad, N. G. Martin, A. Hofman, K. L.  
849 McMahan, S. J. Van Der Lee, C. M. Van Duijn, G. I. De Zubicaray, A. G. Uitterlinden, M. J. Wright, W. J. Niessen,  
850 P. M. Thompson, M. A. Ikram, H. H. H. Adams, Heritability of the shape of subcortical brain structures in the  
851 general population. *Nat Commun* **7**, 13738 (2016).  
852 8. B. A. Gutman, T. G. M. Van Erp, G. L. Alpert, C. R. K. Ching, D. Isaev, A. Ragothaman, N. Jahanshad, A.  
853 Saremi, A. Zavaliangos-Petropulu, D. C. Glahn, L. Shen, S. Cong, D. Alnæs, O. A. Andreassen, N. T. Doan, L. T.  
854 Westlye, P. Kochunov, T. D. Satterthwaite, D. H. Wolf, A. J. Huang, C. Kessler, A. Weideman, D. Nguyen, B. A.  
855 Mueller, L. Faziola, S. G. Potkin, A. Preda, D. H. Mathalon, J. Bustillo, V. Calhoun, J. M. Ford, E. Walton, S.  
856 Ehrlich, G. Ducci, N. Banaj, F. Piras, F. Piras, G. Spalletta, E. J. Canales-Rodríguez, P. Fuentes-Claramonte, E.  
857 Pomarol-Clotet, J. Radua, R. Salvador, S. Sarró, E. W. Dickie, A. Voineskos, D. Tordesillas-Gutiérrez, B. Crespo-  
858 Facorro, E. Setién-Suero, J. M. Van Son, S. Borgwardt, F. Schönborn-Harrisberger, D. Morris, G. Donohoe, L.  
859 Holleran, D. Cannon, C. McDonald, A. Corvin, M. Gill, G. B. Filho, P. G. P. Rosa, M. H. Serpa, M. V. Zanetti, I.  
860 Lebedeva, V. Kaleda, A. Tomyshev, T. Crow, A. James, S. Cervenka, C. M. Sellgren, H. Fatouros-Bergman, I.  
861 Agartz, F. Howells, D. J. Stein, H. Temmingh, A. Uhlmann, G. I. De Zubicaray, K. L. McMahan, M. Wright, D.  
862 Cobia, J. G. Csernansky, P. M. Thompson, J. A. Turner, L. Wang, A META-ANALYSIS of deep brain structural shape  
863 and asymmetry abnormalities in 2,833 individuals with schizophrenia compared with 3,929 healthy volunteers via the  
864 ENIGMA CONSORTIUM. *Human Brain Mapping* **43**, 352–372 (2022).  
865 9. L. T. Elliott, K. Sharp, F. Alfaro-Almagro, S. Shi, K. L. Miller, G. Douaud, J. Marchini, S. M. Smith,  
866 Genome-wide association studies of brain imaging phenotypes in UK Biobank. *Nature* **562**, 210–216 (2018).  
867 10. C. C. Fan, R. Loughnan, C. Makowski, D. Pecheva, C.-H. Chen, D. J. Hagler, W. K. Thompson, N. Parker,  
868 D. van der Meer, O. Frei, O. A. Andreassen, A. M. Dale, Multivariate genome-wide association study on tissue-  
869 sensitive diffusion metrics highlights pathways that shape the human brain. *Nat Commun* **13**, 2423 (2022).  
870 11. S. Goovaerts, H. Hoskens, R. J. Eller, N. Herrick, A. M. Musolf, C. M. Justice, M. Yuan, S. Naqvi, M. K.



- 871 Lee, D. Vandermeulen, H. L. Szabo-Rogers, P. A. Romitti, S. A. Boyadjiev, M. L. Marazita, J. R. Shaffer, M. D.  
872 Shriver, J. Wysocka, S. Walsh, S. M. Weinberg, P. Claes, Joint multi-ancestry and admixed GWAS reveals the  
873 complex genetics behind human cranial vault shape. *Nat Commun* **14**, 7436 (2023).
- 874 12. S. Naqvi, Y. Sleyp, H. Hoskens, K. Indencleef, J. P. Spence, R. Bruffaerts, A. Radwan, R. J. Eller, S.  
875 Richmond, M. D. Shriver, J. R. Shaffer, S. M. Weinberg, S. Walsh, J. Thompson, J. K. Pritchard, S. Sunaert, H.  
876 Peeters, J. Wysocka, P. Claes, Shared heritability of human face and brain shape. *Nat Genet* **53**, 830–839 (2021).
- 877 13. M. Reuter, F.-E. Wolter, N. Peinecke, Laplace–Beltrami spectra as ‘Shape-DNA’ of surfaces and solids.  
878 *Computer-Aided Design* **38**, 342–366 (2006).
- 879 14. M. Reuter, F.-E. Wolter, N. Peinecke, “Laplace-spectra as fingerprints for shape matching” in *Proceedings*  
880 *of the 2005 ACM Symposium on Solid and Physical Modeling* (ACM, Cambridge Massachusetts, 2005);  
881 <https://dl.acm.org/doi/10.1145/1060244.1060256>, pp. 101–106.
- 882 15. E. F. F. Chladni, *Entdeckungen über die Theorie des Klanges* (bey Weidmanns Erben und Reich, 1787);  
883 <https://www.e-rara.ch/zut/doi/10.3931/e-rara-4235>.
- 884 16. M. Kac, Can One Hear the Shape of a Drum? *The American Mathematical Monthly* **73**, 1 (1966).
- 885 17. C. Gordon, D. L. Webb, S. Wolpert, One cannot hear the shape of a drum. *Bull. Amer. Math. Soc.* **27**, 134–  
886 138 (1992).
- 887 18. S. Zelditch, Inverse spectral problem for analytic domains, II:  $\mathbb{Z}_2$ -symmetric domains. *Ann. Math.* **170**,  
888 205–269 (2009).
- 889 19. M. Reuter, F.-E. Wolter, M. Shenton, M. Niethammer, Laplace–Beltrami eigenvalues and topological  
890 features of eigenfunctions for statistical shape analysis. *Computer-Aided Design* **41**, 739–755 (2009).
- 891 20. H. P. McKean, Jr., I. M. Singer, Curvature and the eigenvalues of the Laplacian. *J. Differential Geom.* **1**  
892 (1967).
- 893 21. C. Wachinger, P. Golland, W. Kremen, B. Fischl, M. Reuter, BrainPrint: A discriminative characterization  
894 of brain morphology. *NeuroImage* **109**, 232–248 (2015).
- 895 22. M. Niethammer, M. Reuter, F.-E. Wolter, S. Bouix, N. Peinecke, M.-S. Koo, M. E. Shenton, “Global  
896 Medical Shape Analysis Using the Laplace-Beltrami Spectrum” in *Medical Image Computing and Computer-Assisted*  
897 *Intervention – MICCAI 2007*, N. Ayache, S. Ourselin, A. Maeder, Eds. (Springer Berlin Heidelberg, Berlin,  
898 Heidelberg, 2007; [http://link.springer.com/10.1007/978-3-540-75757-3\\_103](http://link.springer.com/10.1007/978-3-540-75757-3_103))vol. 4791 of *Lecture Notes in Computer*  
899 *Science*, pp. 850–857.
- 900 23. J. C. Pang, K. M. Aquino, M. Oldehinkel, P. A. Robinson, B. D. Fulcher, M. Breakspear, A. Fornito,  
901 Geometric constraints on human brain function. *Nature* **618**, 566–574 (2023).
- 902 24. D. Van Der Meer, A. A. Shadrin, K. O’Connell, F. Bettella, S. Djurovic, T. Wolfers, D. Alnæs, I. Agartz, O.  
903 B. Smeland, I. Melle, J. M. Sánchez, D. E. J. Linden, A. M. Dale, L. T. Westlye, O. A. Andreassen, O. Frei, T.  
904 Kaufmann, Boosting Schizophrenia Genetics by Utilizing Genetic Overlap With Brain Morphology. *Biological*  
905 *Psychiatry* **92**, 291–298 (2022).
- 906 25. S. Bahrami, K. Nordengen, A. A. Shadrin, O. Frei, D. Van Der Meer, A. M. Dale, L. T. Westlye, O. A.  
907 Andreassen, T. Kaufmann, Distributed genetic architecture across the hippocampal formation implies common  
908 neuropathology across brain disorders. *Nat Commun* **13**, 3436 (2022).
- 909 26. T. Elvsåshagen, A. Shadrin, O. Frei, D. Van Der Meer, S. Bahrami, V. J. Kumar, O. Smeland, L. T. Westlye,  
910 O. A. Andreassen, T. Kaufmann, The genetic architecture of the human thalamus and its overlap with ten common  
911 brain disorders. *Nat Commun* **12**, 2909 (2021).
- 912 27. H. H. Yin, B. J. Knowlton, The role of the basal ganglia in habit formation. *Nat Rev Neurosci* **7**, 464–476  
913 (2006).
- 914 28. L. T. Grinberg, U. Rueb, H. Heinsen, Brainstem: Neglected Locus in Neurodegenerative Diseases. *Front.*  
915 *Neur.* **2** (2011).
- 916 29. K. Watanabe, E. Taskesen, A. van Bochoven, D. Posthuma, Functional mapping and annotation of genetic  
917 associations with FUMA. *Nat Commun* **8**, 1826 (2017).
- 918 30. K. Wang, M. Li, H. Hakonarson, ANNOVAR: functional annotation of genetic variants from high-  
919 throughput sequencing data. *Nucleic Acids Research* **38**, e164 (2010).
- 920 31. M. Kircher, D. M. Witten, P. Jain, B. J. O’Roak, G. M. Cooper, J. Shendure, A general framework for  
921 estimating the relative pathogenicity of human genetic variants. *Nat Genet* **46**, 310–315 (2014).
- 922 32. M. J. Landrum, S. Chitipiralla, G. R. Brown, C. Chen, B. Gu, J. Hart, D. Hoffman, W. Jang, K. Kaur, C. Liu,  
923 V. Lyoshin, Z. Maddipatla, R. Maiti, J. Mitchell, N. O’Leary, G. R. Riley, W. Shi, G. Zhou, V. Schneider, D.  
924 Maglott, J. B. Holmes, B. L. Kattman, ClinVar: improvements to accessing data. *Nucleic Acids Res* **48**, D835–D844  
925 (2020).
- 926 33. J. Cheng, G. Novati, J. Pan, C. Bycroft, A. Žemgulytė, T. Applebaum, A. Pritzel, L. H. Wong, M. Zielinski,  
927 T. Sargeant, R. G. Schneider, A. W. Senior, J. Jumper, D. Hassabis, P. Kohli, Ž. Avsec, Accurate proteome-wide  
928 missense variant effect prediction with AlphaMissense. *Science* **381**, eadg7492 (2023).
- 929 34. Schizophrenia Working Group of the Psychiatric Genomics Consortium, Biological insights from 108  
930 schizophrenia-associated genetic loci. *Nature* **511**, 421–427 (2014).
- 931 35. N. Carrera, M. Arrojo, J. Sanjuán, R. Ramos-Ríos, E. Paz, J. J. Suárez-Rama, M. Páramo, S. Agra, J.

- 932 Brenlla, S. Martínez, O. Rivero, D. A. Collier, A. Palotie, S. Cichon, M. M. Nöthen, M. Rietschel, D. Rujescu, H.  
933 Stefansson, S. Steinberg, E. Sigurdsson, D. St. Clair, S. Tosato, T. Werge, K. Stefansson, J. C. González, J. Valero,  
934 A. Gutiérrez-Zotes, A. Labad, L. Martorell, E. Vilella, Á. Carracedo, J. Costas, Association Study of  
935 Nonsynonymous Single Nucleotide Polymorphisms in Schizophrenia. *Biological Psychiatry* **71**, 169–177 (2012).
- 936 36. GERAD1 Consortium, CRESTAR Consortium, A. F. Pardiñas, P. Holmans, A. J. Pocklington, V. Escott-  
937 Price, S. Ripke, N. Carrera, S. E. Legge, S. Bishop, D. Cameron, M. L. Hamshere, J. Han, L. Hubbard, A. Lynham,  
938 K. Mantripragada, E. Rees, J. H. MacCabe, S. A. McCarroll, B. T. Baune, G. Breen, E. M. Byrne, U. Dannlowski, T.  
939 C. Eley, C. Hayward, N. G. Martin, A. M. McIntosh, R. Plomin, D. J. Porteous, N. R. Wray, A. Caballero, D. H.  
940 Geschwind, L. M. Huckins, D. M. Ruderfer, E. Santiago, P. Sklar, E. A. Stahl, H. Won, E. Agerbo, T. D. Als, O. A.  
941 Andreassen, M. Bækvad-Hansen, P. B. Mortensen, C. B. Pedersen, A. D. Børglum, J. Bybjerg-Grauholm, S.  
942 Djurovic, N. Durmishi, M. G. Pedersen, V. Golimbet, J. Grove, D. M. Hougaard, M. Mattheisen, E. Molden, O.  
943 Mors, M. Nordentoft, M. Pejovic-Milovancevic, E. Sigurdsson, T. Silagadze, C. S. Hansen, K. Stefansson, H.  
944 Stefansson, S. Steinberg, S. Tosato, T. Werge, D. A. Collier, D. Rujescu, G. Kirov, M. J. Owen, M. C. O'Donovan, J.  
945 T. R. Walters, Common schizophrenia alleles are enriched in mutation-intolerant genes and in regions under strong  
946 background selection. *Nat Genet* **50**, 381–389 (2018).
- 947 37. D. Li, J.-P. Achkar, T. Haritunians, J. P. Jacobs, K. Y. Hui, M. D'Amato, S. Brand, G. Radford-Smith, J.  
948 Halfvarson, J.-H. Niess, S. Kugathasan, C. Büning, L. P. Schumm, L. Klei, A. Ananthakrishnan, G. Aumais, L.  
949 Baidoo, M. Dubinsky, C. Fiocchi, J. Glas, R. Milgrom, D. D. Proctor, M. Regueiro, L. A. Simms, J. M. Stempak, S.  
950 R. Targan, L. Törkvist, Y. Sharma, B. Devlin, J. Borneman, H. Hakonarson, R. J. Xavier, M. Daly, S. R. Brant, J. D.  
951 Rioux, M. S. Silverberg, J. H. Cho, J. Braun, D. P. McGovern, R. H. Duerr, A pleiotropic missense variant in  
952 SLC39A8 is associated with Crohn's disease and human gut microbiome composition. *Gastroenterology* **151**, 724–  
953 732 (2016).
- 954 38. The International Consortium for Blood Pressure Genome-Wide Association Studies., Genetic Variants in  
955 Novel Pathways Influence Blood Pressure and Cardiovascular Disease Risk. *Nature* **478**, 103–109 (2011).
- 956 39. T. M. Caffrey, R. Wade-Martins, Functional MAPT haplotypes: Bridging the gap between genotype and  
957 neuropathology. *Neurobiology of Disease* **27**, 1–10 (2007).
- 958 40. M. Wainberg, N. J. Forde, S. Mansour, I. Kerrebijn, S. E. Medland, C. Hawco, S. J. Tripathy, Genetic  
959 architecture of the structural connectome. *Nat Commun* **15**, 1962 (2024).
- 960 41. C. A. de Leeuw, J. M. Mooij, T. Heskes, D. Posthuma, MAGMA: Generalized Gene-Set Analysis of GWAS  
961 Data. *PLOS Computational Biology* **11**, e1004219 (2015).
- 962 42. T. Rittman, M. Rubinov, P. E. Vértes, A. X. Patel, C. E. Ginestet, B. C. P. Ghosh, R. A. Barker, M. G.  
963 Spillantini, E. T. Bullmore, J. B. Rowe, Regional expression of the MAPT gene is associated with loss of hubs in  
964 brain networks and cognitive impairment in Parkinson disease and progressive supranuclear palsy. *Neurobiology of*  
965 *Ageing* **48**, 153–160 (2016).
- 966 43. R. S. Desikan, A. J. Schork, Y. Wang, A. Witoelar, M. Sharma, L. K. McEvoy, D. Holland, J. B. Brewer,  
967 C.-H. Chen, W. K. Thompson, D. Harold, J. Williams, M. J. Owen, M. C. O'Donovan, M. A. Pericak-Vance, R.  
968 Mayeux, J. L. Haines, L. A. Farrer, G. D. Schellenberg, P. Heutink, A. B. Singleton, A. Brice, N. W. Wood, J. Hardy,  
969 M. Martinez, S. H. Choi, A. DeStefano, M. A. Ikram, J. C. Bis, A. Smith, A. L. Fitzpatrick, L. Launer, C. Van Duijn,  
970 S. Seshadri, I. D. Ulstein, D. Aarsland, T. Fladby, S. Djurovic, B. T. Hyman, J. Snaedal, H. Stefansson, K.  
971 Stefansson, T. Gasser, O. A. Andreassen, A. M. Dale, for the ADNI ADGC, GERAD, CHARGE and IPDGC  
972 Investigators, Genetic overlap between Alzheimer's disease and Parkinson's disease at the MAPT locus. *Mol*  
973 *Psychiatry* **20**, 1588–1595 (2015).
- 974 44. E. M. Weeks, J. C. Ulirsch, N. Y. Cheng, B. L. Trippe, R. S. Fine, J. Miao, T. A. Patwardhan, M. Kanai, J.  
975 Nasser, C. P. Fulco, K. C. Tashman, F. Aguet, T. Li, J. Ordovas-Montanes, C. S. Smillie, M. Biton, A. K. Shalek, A.  
976 N. Ananthakrishnan, R. J. Xavier, A. Regev, R. M. Gupta, K. Lage, K. G. Ardlie, J. N. Hirschhorn, E. S. Lander, J.  
977 M. Engreitz, H. K. Finucane, Leveraging polygenic enrichments of gene features to predict genes underlying  
978 complex traits and diseases. *Nat Genet* **55**, 1267–1276 (2023).
- 979 45. Z. Sha, D. Schijven, S. E. Fisher, C. Francks, Genetic architecture of the white matter connectome of the  
980 human brain. *SCIENCE ADVANCES* (2023).
- 981 46. Y. Benjamini, Y. Hochberg, Controlling the False Discovery Rate: A Practical and Powerful Approach to  
982 Multiple Testing. *Journal of the Royal Statistical Society: Series B (Methodological)* **57**, 289–300 (1995).
- 983 47. Y. Wu, K. S. Burch, A. Ganna, P. Pajukanta, B. Pasaniuc, S. Sankararaman, Fast estimation of genetic  
984 correlation for biobank-scale data. *The American Journal of Human Genetics* **109**, 24–32 (2022).
- 985 48. C. Palmer, I. Pe'er, Statistical correction of the Winner's Curse explains replication variability in  
986 quantitative trait genome-wide association studies. *PLoS Genet* **13**, e1006916 (2017).
- 987 49. D. van der Meer, J. Rokicki, T. Kaufmann, A. Córdova-Palomera, T. Moberget, D. Alnæs, F. Bettella, O.  
988 Frei, N. T. Doan, I. E. Sønderby, O. B. Smeland, I. Agartz, A. Bertolino, J. Bralten, C. L. Brandt, J. K. Buitelaar, S.  
989 Djurovic, M. van Donkelaar, E. S. Dørum, T. Espeseth, S. V. Faraone, G. Fernández, S. E. Fisher, B. Franke, B.  
990 Haatveit, C. A. Hartman, P. J. Hoekstra, A. K. Håberg, E. G. Jönsson, K. K. Kolskår, S. Le Hellard, M. J. Lund, A. J.  
991 Lundervold, A. Lundervold, I. Melle, J. Monereo Sánchez, L. C. Norbom, J. E. Nordvik, L. Nyberg, J. Oosterlaan, M.  
992 Papalino, A. Papassotiropoulos, G. Pergola, D. J. F. de Quervain, G. Richard, A.-M. Sanders, P. Selvaggi, E.

- 993 Shumskaya, V. M. Steen, S. Tønnesen, K. M. Ulrichsen, M. P. Zwiers, O. A. Andreassen, L. T. Westlye, Brain scans  
994 from 21,297 individuals reveal the genetic architecture of hippocampal subfield volumes. *Mol Psychiatry* **25**, 3053–  
995 3065 (2020).
- 996 50. M. Lanfranchi, S. Yandiev, G. Meyer-Dilhet, S. Ellouze, M. Kerkhofs, R. Dos Reis, A. Garcia, C. Blondet,  
997 A. Amar, A. Kneppers, H. Polvêche, D. Plassard, M. Foretz, B. Viollet, K. Sakamoto, R. Mounier, C. F. Bourgeois,  
998 O. Raineteau, E. Goillot, J. Courchet, The AMPK-related kinase NUA1 controls cortical axons branching by locally  
999 modulating mitochondrial metabolic functions. *Nat Commun* **15**, 2487 (2024).
- 1000 51. C. Makowski, H. Wang, A. Srinivasan, A. Qi, Y. Qiu, D. van der Meer, O. Frei, J. Zou, P. M. Visscher, J.  
1001 Yang, C.-H. Chen, Larger cerebral cortex is genetically correlated with greater frontal area and dorsal thickness.  
1002 *Proceedings of the National Academy of Sciences* **120**, e2214834120 (2023).
- 1003 52. A. Okbay, Y. Wu, N. Wang, H. Jayashankar, M. Bennett, S. M. Nehzati, J. Sidorenko, H. Kweon, G.  
1004 Goldman, T. Gjorgjieva, Y. Jiang, B. Hicks, C. Tian, D. A. Hinds, R. Ahlskog, P. K. E. Magnusson, S. Oskarsson, C.  
1005 Hayward, A. Campbell, D. J. Porteous, J. Freese, P. Herd, C. Watson, J. Jala, D. Conley, P. D. Koellinger, M.  
1006 Johannesson, D. Laibson, M. N. Meyer, J. J. Lee, A. Kong, L. Yengo, D. Cesarini, P. Turley, P. M. Visscher, J. P.  
1007 Beauchamp, D. J. Benjamin, A. I. Young, Polygenic prediction of educational attainment within and between  
1008 families from genome-wide association analyses in 3 million individuals. *Nat Genet* **54**, 437–449 (2022).
- 1009 53. M. P. M. Soutar, D. Melandri, B. O’Callaghan, E. Annuario, A. E. Monaghan, N. J. Welsh, K. D’Sa, S.  
1010 Guelfi, D. Zhang, A. Pittman, D. Trabzuni, A. H. A. Verboven, K. S. Pan, D. A. Kia, M. Bictash, S. Gandhi, H.  
1011 Houlden, M. R. Cookson, N. N. Kasri, N. W. Wood, A. B. Singleton, J. Hardy, P. J. Whiting, C. Blauwendraat, A. J.  
1012 Whitworth, C. Manzoni, M. Ryten, P. A. Lewis, H. Plun-Favreau, Regulation of mitophagy by the NSL complex  
1013 underlies genetic risk for Parkinson’s disease at 16q11.2 and MAPT H1 loci. *Brain* **145**, 4349–4367 (2022).
- 1014 54. M. Baker, I. Litvan, H. Houlden, J. Adamson, D. Dickson, J. Perez-Tur, J. Hardy, T. Lynch, E. Bigio, M.  
1015 Hutton, Association of an Extended Haplotype in the Tau Gene with Progressive Supranuclear Palsy. *Human*  
1016 *Molecular Genetics* **8**, 711–715 (1999).
- 1017 55. A. M. Pittman, The structure of the tau haplotype in controls and in progressive supranuclear palsy. *Human*  
1018 *Molecular Genetics* **13**, 1267–1274 (2004).
- 1019 56. A. M. Pittman, A. J. Myers, P. Abou-Sleiman, H. C. Fung, M. Kaleem, L. Marlowe, J. Duckworth, D.  
1020 Leung, D. Williams, L. Kilford, N. Thomas, C. M. Morris, D. Dickson, N. W. Wood, J. Hardy, A. J. Lees, R. de  
1021 Silva, Linkage disequilibrium fine mapping and haplotype association analysis of the tau gene in progressive  
1022 supranuclear palsy and corticobasal degeneration. *Journal of Medical Genetics* **42**, 837–846 (2005).
- 1023 57. P. Pastor, M. Ezquerra, J. C. Perez, S. Chakraverty, J. Norton, B. A. Racette, D. McKeel, J. S. Perlmutter, E.  
1024 Tolosa, A. M. Goate, Novel haplotypes in 17q21 are associated with progressive supranuclear palsy. *Annals of*  
1025 *Neurology* **56**, 249–258 (2004).
- 1026 58. M. G. Spillantini, J. R. Murrell, M. Goedert, M. R. Farlow, A. Klug, B. Ghetti, Mutation in the tau gene in  
1027 familial multiple system tauopathy with presenile dementia. *Proceedings of the National Academy of Sciences* **95**,  
1028 7737–7741 (1998).
- 1029 59. J. Simón-Sánchez, C. Schulte, J. M. Bras, M. Sharma, J. R. Gibbs, D. Berg, C. Paisan-Ruiz, P. Lichtner, S.  
1030 W. Scholz, D. G. Hernandez, R. Krüger, M. Federoff, C. Klein, A. Goate, J. Perlmutter, M. Bonin, M. A. Nalls, T.  
1031 Illig, C. Gieger, H. Houlden, M. Steffens, M. S. Okun, B. A. Racette, M. R. Cookson, K. D. Foote, H. H. Fernandez,  
1032 B. J. Traynor, S. Schreiber, S. Arepalli, R. Zonozi, K. Gwinn, M. van der Brug, G. Lopez, S. J. Chanock, A.  
1033 Schatzkin, Y. Park, A. Hollenbeck, J. Gao, X. Huang, N. W. Wood, D. Lorenz, G. Deuschl, H. Chen, O. Riess, J. A.  
1034 Hardy, A. B. Singleton, T. Gasser, Genome-wide association study reveals genetic risk underlying Parkinson’s  
1035 disease. *Nat Genet* **41**, 1308–1312 (2009).
- 1036 60. P. Sánchez-Juan, S. Moreno, I. de Rojas, I. Hernández, S. Valero, M. Alegret, L. Montreal, P. García  
1037 González, C. Lage, S. López-García, E. Rodríguez-Rodríguez, A. Orellana, L. Tárraga, M. Boada, A. Ruiz, The  
1038 MAPT H1 Haplotype Is a Risk Factor for Alzheimer’s Disease in APOE ε4 Non-carriers. *Front Aging Neurosci* **11**,  
1039 327 (2019).
- 1040 61. N. Kouri, O. A. Ross, B. Dombroski, C. S. Younkin, D. J. Serie, A. Soto-Ortolaza, M. Baker, N. C. A.  
1041 Finch, H. Yoon, J. Kim, S. Fujioka, C. A. McLean, B. Ghetti, S. Spina, L. B. Cantwell, M. R. Farlow, J. Grafman, E.  
1042 D. Huey, M. Ryung Han, S. Beecher, E. T. Geller, H. A. Kretschmar, S. Roeber, M. Gearing, J. L. Juncos, J. P. G.  
1043 Vonsattel, V. M. Van Deerlin, M. Grossman, H. I. Hurtig, R. G. Gross, S. E. Arnold, J. Q. Trojanowski, V. M. Lee,  
1044 G. K. Wenning, C. L. White, G. U. Höglinger, U. Müller, B. Devlin, L. I. Golbe, J. Crook, J. E. Parisi, B. F. Boeve,  
1045 K. A. Josephs, Z. K. Wszolek, R. J. Uitti, N. R. Graff-Radford, I. Litvan, S. G. Younkin, L.-S. Wang, N. Ertekin-  
1046 Taner, R. Rademakers, H. Hakonarsen, G. D. Schellenberg, D. W. Dickson, Genome-wide association study of  
1047 corticobasal degeneration identifies risk variants shared with progressive supranuclear palsy. *Nat Commun* **6**, 7247  
1048 (2015).
- 1049 62. C. Bellenguez, F. Küçükali, I. E. Jansen, L. Kleindam, S. Moreno-Grau, N. Amin, A. C. Naj, R. Campos-  
1050 Martin, B. Grenier-Boley, V. Andrade, P. A. Holmans, A. Boland, V. Damotte, S. J. van der Lee, M. R. Costa, T.  
1051 Kuulasmaa, Q. Yang, I. de Rojas, J. C. Bis, A. Yaqub, I. Prokic, J. Chapuis, S. Ahmad, V. Giedraitis, D. Aarsland, P.  
1052 Garcia-Gonzalez, C. Abdelnour, E. Alarcón-Martín, D. Alcolea, M. Alegret, I. Alvarez, V. Álvarez, N. J. Armstrong,  
1053 A. Tsolaki, C. Antúnez, I. Appollonio, M. Arcaro, S. Archetti, A. A. Pastor, B. Arosio, L. Athanasiu, H. Bailly, N.



- 1054 Banaj, M. Baquero, S. Barral, A. Beiser, A. B. Pastor, J. E. Below, P. Benchek, L. Benussi, C. Berr, C. Besse, V.  
1055 Bessi, G. Binetti, A. Bizarro, R. Blesa, M. Boada, E. Boerwinkle, B. Borroni, S. Boschi, P. Bossù, G. Bråthen, J.  
1056 Bressler, C. Bresner, H. Brodaty, K. J. Brookes, L. I. Brusco, D. Buiza-Rueda, K. Bürger, V. Burholt, W. S. Bush, M.  
1057 Calero, L. B. Cantwell, G. Chene, J. Chung, M. L. Cuccaro, Á. Carracedo, R. Cecchetti, L. Cervera-Carles, C.  
1058 Charbonnier, H.-H. Chen, C. Chillotti, S. Ciccone, J. A. H. R. Claassen, C. Clark, E. Conti, A. Corma-Gómez, E.  
1059 Costantini, C. Custodero, D. Daian, M. C. Dalmaso, A. Daniele, E. Dardiotis, J.-F. Dartigues, P. P. de Deyn, K. de  
1060 Paiva Lopes, L. D. de Witte, S. Dobbie, J. Deckert, T. del Ser, N. Denning, A. DeStefano, M. Dichgans, J. Diehl-  
1061 Schmid, M. Diez-Fairen, P. D. Rossi, S. Djurovic, E. Duron, E. Düzel, C. Dufouil, G. Eiriksdottir, S. Engelborghs, V.  
1062 Escott-Price, A. Espinosa, M. Ewers, K. M. Faber, T. Fabrizio, S. F. Nielsen, D. W. Fardo, L. Farotti, C. Fenoglio,  
1063 M. Fernández-Fuertes, R. Ferrari, C. B. Ferreira, E. Ferri, B. Fin, P. Fischer, T. Fladby, K. Fließbach, B. Fongang, M.  
1064 Fornage, J. Fortea, T. M. Foroud, S. Fostinelli, N. C. Fox, E. Franco-Macias, M. J. Bullido, A. Frank-García, L.  
1065 Froelich, B. Fulton-Howard, D. Galimberti, J. M. García-Alberca, P. García-González, S. Garcia-Madrona, G.  
1066 Garcia-Ribas, R. Ghidoni, I. Giegling, G. Giorgio, A. M. Goate, O. Goldhardt, D. Gomez-Fonseca, A. González-  
1067 Pérez, C. Graff, G. Grande, E. Green, T. Grimmer, E. Grünblatt, M. Grunin, V. Gudnason, T. Guetta-Baranes, A.  
1068 Haapasalo, G. Hadjigeorgiou, J. L. Haines, K. L. Hamilton-Nelson, H. Hampel, O. Hanon, J. Hardy, A. M.  
1069 Hartmann, L. Hausner, J. Harwood, S. Heilmann-Heimbach, S. Helisalmi, M. T. Heneka, I. Hernández, M. J.  
1070 Herrmann, P. Hoffmann, C. Holmes, H. Holstege, R. H. Vilas, M. Hulsman, J. Humphrey, G. J. Biessels, X. Jian, C.  
1071 Johansson, G. R. Jun, Y. Kastumata, J. Kauwe, P. G. Kehoe, L. Kilander, A. K. Ståhlbom, M. Kivipelto, A. Koivisto,  
1072 J. Kornhuber, M. H. Kosmidis, W. A. Kukull, P. P. Kuksa, B. W. Kunkle, A. B. Kuzma, C. Lage, E. J. Laukka, L.  
1073 Launer, A. Lauria, C.-Y. Lee, J. Lehtisalo, O. Lerch, A. Lleó, W. Longstreth, O. Lopez, A. L. de Munain, S. Love,  
1074 M. Löwemark, L. Luckcuck, K. L. Lunetta, Y. Ma, J. Macías, C. A. MacLeod, W. Maier, F. Mangialasche, M.  
1075 Spallazzi, M. Marquie, R. Marshall, E. R. Martin, A. M. Montes, C. M. Rodríguez, C. Masullo, R. Mayeux, S. Mead,  
1076 P. Mecocci, M. Medina, A. Meggy, S. Mehrabian, S. Mendoza, M. Menéndez-González, P. Mir, S. Moebus, M. Mol,  
1077 L. Molina-Porcel, L. Montreal, L. Morelli, F. Moreno, K. Morgan, T. Mosley, M. M. Nöthen, C. Muchnik, S.  
1078 Mukherjee, B. Nacmias, T. Ngandu, G. Nicolas, B. G. Nordestgaard, R. Olaso, A. Orellana, M. Orsini, G. Ortega, A.  
1079 Padovani, C. Paolo, G. Papenberg, L. Parnetti, F. Pasquier, P. Pastor, G. Peloso, A. Pérez-Cordón, J. Pérez-Tur, P.  
1080 Pericard, O. Peters, Y. A. L. Pijnenburg, J. A. Pineda, G. Piñol-Ripoll, C. Pisanu, T. Polak, J. Popp, D. Posthuma, J.  
1081 Priller, R. Puerta, O. Quenez, I. Quintela, J. Q. Thomassen, A. Rábano, I. Rainero, F. Rajabli, I. Ramakers, L. M.  
1082 Real, M. J. T. Reinders, C. Reitz, D. Reyes-Dumeyer, P. Ridge, S. Riedel-Heller, P. Riederer, N. Roberto, E.  
1083 Rodriguez-Rodriguez, A. Rongve, I. R. Allende, M. Rosende-Roca, J. L. Royo, E. Rubino, D. Rujescu, M. E. Sáez,  
1084 P. Sakka, I. Saltvedt, Á. Sanabria, M. B. Sánchez-Arjona, F. Sanchez-Garcia, P. S. Juan, R. Sánchez-Valle, S. B.  
1085 Sando, C. Sarnowski, C. L. Satizabal, M. Scamosci, N. Scarmeas, E. Scarpini, P. Scheltens, N. Scherbaum, M.  
1086 Scherer, M. Schmid, A. Schneider, J. M. Schott, G. Selbæk, D. Seripa, M. Serrano, J. Sha, A. A. Shadrin, O. Skrobot,  
1087 S. Slifer, G. J. L. Snijders, H. Soininen, V. Solfrizzi, A. Solomon, Y. Song, S. Sorbi, O. Sotolongo-Grau, G. Spalletta,  
1088 A. Spottke, A. Squassina, E. Stordal, J. P. Tartan, L. Tárraga, N. Tesí, A. Thalamuthu, T. Thomas, G. Tosto, L.  
1089 Traykov, L. Tremolizzo, A. Tybjaerg-Hansen, A. Uitterlinden, A. Ullgren, I. Ulstein, S. Valero, O. Valladares, C. V.  
1090 Broeckhoven, J. Vance, B. N. Vardarajan, A. van der Lugt, J. V. Dongen, J. van Rooij, J. van Swieten, R.  
1091 Vandenberghe, F. Verhey, J.-S. Vidal, J. Vogelgsang, M. Vyhnalek, M. Wagner, D. Wallon, L.-S. Wang, R. Wang,  
1092 L. Weinhold, J. Wiltfang, G. Windle, B. Woods, M. Yannakoulia, H. Zare, Y. Zhao, X. Zhang, C. Zhu, M. Zulaica,  
1093 L. A. Farrer, B. M. Psaty, M. Ghanbari, T. Raj, P. Sachdev, K. Mather, F. Jessen, M. A. Ikram, A. de Mendonça, J.  
1094 Hort, M. Tsolaki, M. A. Pericak-Vance, P. Amouyel, J. Williams, R. Frikke-Schmidt, J. Clarimon, J.-F. Deleuze, G.  
1095 Rossi, S. Seshadri, O. A. Andreassen, M. Ingelsson, M. Hiltunen, K. Sleegers, G. D. Schellenberg, C. M. van Duijn,  
1096 R. Sims, W. M. van der Flier, A. Ruiz, A. Ramirez, J.-C. Lambert, New insights into the genetic etiology of  
1097 Alzheimer's disease and related dementias. *Nat Genet* **54**, 412–436 (2022).  
1098 63. W. Huang, J. Zeng, L. Jia, D. Zhu, J. O'Brien, C. Ritchie, N. Shu, L. Su, Genetic risks of Alzheimer's by  
1099 APOE and MAPT on cortical morphology in young healthy adults. *Brain Commun* **5**, ead234 (2023).  
1100 64. J. H. Lee, J. Ryan, C. Andreescu, H. Aizenstein, H. K. Lim, Brainstem morphological changes in  
1101 Alzheimer's disease. *Neuroreport* **26**, 411–415 (2015).  
1102 65. P. Theofilas, A. J. Ehrenberg, S. Dunlop, A. T. Alho, A. Nguy, R. E. P. Leite, R. D. Rodriguez, M. B. Mejia,  
1103 C. K. Suemoto, R. E. de Lucena Ferretti-Rebustini, L. Polichiso, C. F. Nascimento, W. W. Seeley, R. Nitrini, C. A.  
1104 Pasqualucci, W. J. Filho, U. Rueb, J. Neuhaus, H. Heinsen, L. T. Grinberg, Locus coeruleus volume and cell  
1105 population changes during Alzheimer's disease progression: a stereological study in human postmortem brains with  
1106 potential implication for early-stage biomarker discovery. *Alzheimers Dement* **13**, 236–246 (2017).  
1107 66. A. J. Ehrenberg, C. K. Suemoto, E. de Paula França Resende, C. Petersen, R. E. P. Leite, R. D. Rodriguez,  
1108 R. E. de Lucena Ferretti-Rebustini, M. You, J. Oh, R. Nitrini, C. A. Pasqualucci, W. Jacob-Filho, J. H. Kramer, J. R.  
1109 Gatchel, L. T. Grinberg, Neuropathologic Correlates of Psychiatric Symptoms in Alzheimer's Disease. *J Alzheimers*  
1110 *Dis* **66**, 115–126 (2018).  
1111 67. D. A. Koolen, R. Pfundt, K. Linda, G. Beunders, H. E. Veenstra-Knol, J. H. Conta, A. M. Fortuna, G.  
1112 Gillesen-Kaesbach, S. Dugan, S. Halbach, O. A. Abdul-Rahman, H. M. Winesett, W. K. Chung, M. Dalton, P. S.  
1113 Dimova, T. Mattina, K. Prescott, H. Z. Zhang, H. M. Saal, J. Y. Hehir-Kwa, M. H. Willemsen, C. W. Ockeloen, M.  
1114 C. Jongmans, N. Van der Aa, P. Failla, C. Barone, E. Avola, A. S. Brooks, S. G. Kant, E. H. Gerkes, H. V. Firth, K.

- 1115 Öunap, L. M. Bird, D. Masser-Frye, J. R. Friedman, M. A. Sokunbi, A. Dixit, M. Splitt, M. K. Kukulich, J.  
1116 McGaughan, B. P. Coe, J. Flórez, N. Nadif Kasri, H. G. Brunner, E. M. Thompson, J. Gecz, C. Romano, E. E.  
1117 Eichler, B. B. de Vries, The Koolen-de Vries syndrome: a phenotypic comparison of patients with a 17q21.31  
1118 microdeletion versus a KANSL1 sequence variant. *Eur J Hum Genet* **24**, 652–659 (2016).
- 1119 68. J. Xu, N. Liu, E. Polemiti, L. Garcia-Mondragon, J. Tang, X. Liu, T. Lett, L. Yu, M. M. Nöthen, J. Feng, C.  
1120 Yu, A. Marquand, G. Schumann, Effects of urban living environments on mental health in adults. *Nat Med* **29**, 1456–  
1121 1467 (2023).
- 1122 69. A. C. H. Chen, N. Manz, Y. Tang, M. Rangaswamy, L. Almasy, S. Kuperman, J. Nurnberger Jr, S. J.  
1123 O'Connor, H. J. Edenberg, M. A. Schuckit, J. Tischfield, T. Foroud, L. J. Bierut, J. Rohrbaugh, J. P. Rice, A. Goate,  
1124 V. Hesselbrock, B. Porjesz, Single-Nucleotide Polymorphisms in Corticotropin Releasing Hormone Receptor 1 Gene  
1125 (CRHR1) Are Associated With Quantitative Trait of Event-Related Potential and Alcohol Dependence. *Alcoholism:  
1126 Clinical and Experimental Research* **34**, 988–996 (2010).
- 1127 70. D. Blomeyer, J. Treutlein, G. Esser, M. H. Schmidt, G. Schumann, M. Laucht, Interaction between CRHR1  
1128 Gene and Stressful Life Events Predicts Adolescent Heavy Alcohol Use. *Biological Psychiatry* **63**, 146–151 (2008).
- 1129 71. R. Daviet, G. Aydogan, K. Jagannathan, N. Spilka, P. D. Koellinger, H. R. Kranzler, G. Nave, R. R.  
1130 Wetherill, Associations between alcohol consumption and gray and white matter volumes in the UK Biobank. *Nat  
1131 Commun* **13**, 1175 (2022).
- 1132 72. A. Thompson, J. Cook, H. Choquet, E. Jorgenson, J. Yin, T. Kinnunen, J. Barclay, A. P. Morris, M.  
1133 Pirmohamed, Functional validity, role, and implications of heavy alcohol consumption genetic loci. *Sci Adv* **6**,  
1134 eaay5034 (2020).
- 1135 73. T. Chambers, V. Escott-Price, S. Legge, E. Baker, K. D. Singh, J. T. R. Walters, X. Caseras, R. J. L. Anney,  
1136 Genetic common variants associated with cerebellar volume and their overlap with mental disorders: a study on  
1137 33,265 individuals from the UK-Biobank. *Mol Psychiatry* **27**, 2282–2290 (2022).
- 1138 74. N. C. Andreasen, R. Pierson, The Role of the Cerebellum in Schizophrenia. *Biol Psychiatry* **64**, 81–88  
1139 (2008).
- 1140 75. T. G. M. van Erp, D. P. Hibar, J. M. Rasmussen, D. C. Glahn, G. D. Pearlson, O. A. Andreassen, I. Agartz,  
1141 L. T. Westlye, U. K. Haukvik, A. M. Dale, I. Melle, C. B. Hartberg, O. Gruber, B. Kraemer, D. Zilles, G. Donohoe,  
1142 S. Kelly, C. McDonald, D. W. Morris, D. M. Cannon, A. Corvin, M. W. J. Machielsen, L. Koenders, L. de Haan, D.  
1143 J. Veltman, T. D. Satterthwaite, D. H. Wolf, R. C. Gur, R. E. Gur, S. G. Potkin, D. H. Mathalon, B. A. Mueller, A.  
1144 Preda, F. Macciardi, S. Ehrlich, E. Walton, J. Hass, V. D. Calhoun, H. J. Bockholt, S. R. Sponheim, J. M. Shoemaker,  
1145 N. E. M. van Haren, H. E. H. Pol, R. A. Ophoff, R. S. Kahn, R. Roiz-Santiañez, B. Crespo-Facorro, L. Wang, K. I.  
1146 Alpert, E. G. Jönsson, R. Dimitrova, C. Bois, H. C. Whalley, A. M. McIntosh, S. M. Lawrie, R. Hashimoto, P. M.  
1147 Thompson, J. A. Turner, Subcortical brain volume abnormalities in 2028 individuals with schizophrenia and 2540  
1148 healthy controls via the ENIGMA consortium. *Mol Psychiatry* **21**, 547–553 (2016).
- 1149 76. N. Okada, M. Fukunaga, K. Miura, K. Nemoto, J. Matsumoto, N. Hashimoto, M. Kiyota, K. Morita, D.  
1150 Koshiyama, K. Ohi, T. Takahashi, M. Koeda, H. Yamamori, M. Fujimoto, Y. Yasuda, N. Hasegawa, H. Narita, S.  
1151 Yokoyama, R. Mishima, T. Kawashima, Y. Kobayashi, D. Sasabayashi, K. Harada, M. Yamamoto, Y. Hirano, T.  
1152 Itahashi, M. Nakataki, R. Hashimoto, K. K. Tha, S. Koike, T. Matsubara, G. Okada, T. G. M. van Erp, N. Jahanshad,  
1153 R. Yoshimura, O. Abe, T. Onitsuka, Y. Watanabe, K. Matsuo, H. Yamasue, Y. Okamoto, M. Suzuki, J. A. Turner, P.  
1154 M. Thompson, N. Ozaki, K. Kasai, R. Hashimoto, Subcortical volumetric alterations in four major psychiatric  
1155 disorders: a mega-analysis study of 5604 subjects and a volumetric data-driven approach for classification. *Mol  
1156 Psychiatry*, 1–11 (2023).
- 1157 77. Y. Jiang, C. Luo, J. Wang, L. Palaniyappan, X. Chang, S. Xiang, J. Zhang, M. Duan, H. Huang, C. Gaser, K.  
1158 Nemoto, K. Miura, R. Hashimoto, L. T. Westlye, G. Richard, S. Fernandez-Cabello, N. Parker, O. A. Andreassen, T.  
1159 Kircher, I. Nenadić, F. Stein, F. Thomas-Odenthal, L. Teutenberg, P. Usemann, U. Dannlowski, T. Hahn, D.  
1160 Grotegerd, S. Meinert, R. Lencer, Y. Tang, T. Zhang, C. Li, W. Yue, Y. Zhang, X. Yu, E. Zhou, C.-P. Lin, S.-J. Tsai,  
1161 A. L. Rodrigue, D. Glahn, G. Pearlson, J. Blangero, A. Karuk, E. Pomarol-Clotet, R. Salvador, P. Fuentes-  
1162 Claramonte, M. Á. Garcia-León, G. Spalletta, F. Piras, D. Vecchio, N. Banaj, J. Cheng, Z. Liu, J. Yang, A. S. Gonul,  
1163 O. Uslu, B. B. Burhanoglu, A. U. Demir, K. Rootes-Murdy, V. D. Calhoun, K. Sim, M. Green, Y. Quidé, Y. C.  
1164 Chung, W.-S. Kim, S. R. Sponheim, C. Demro, I. S. Ramsay, F. Iasevoli, A. de Bartolomeis, A. Barone, M.  
1165 Ciccarelli, A. Brunetti, S. Cocozza, G. Pontillo, M. Tranfa, M. T. M. Park, M. Kirschner, F. Georgiadis, S. Kaiser, T.  
1166 E. V. Rheenen, S. L. Rossell, M. Hughes, W. Woods, S. P. Carruthers, P. Sumner, E. Ringin, F. Spaniel, A. Skoch,  
1167 D. Tomecek, P. Homan, S. Homan, W. Omlor, G. Cecere, D. D. Nguyen, A. Preda, S. Thomopoulos, N. Jahanshad,  
1168 L.-B. Cui, D. Yao, P. M. Thompson, J. A. Turner, T. G. M. van Erp, W. Cheng, J. Feng, Two neurostructural  
1169 subtypes: results of machine learning on brain images from 4,291 individuals with schizophrenia. *medRxiv*,  
1170 2023.10.11.23296862 (2023).
- 1171 78. J. R. Glausier, D. A. Lewis, Dendritic spine pathology in schizophrenia. *Neuroscience* **251**, 90–107 (2013).
- 1172 79. S. Li, C. Ma, Y. Li, R. Chen, Y. Liu, L. P. Wan, Q. Xiong, C. Wang, Y. Huo, X. Dang, Y. Yang, L. Lv, X.  
1173 Chen, N. Sheng, W. Li, X.-J. Luo, The schizophrenia-associated missense variant rs13107325 regulates dendritic  
1174 spine density. *Transl Psychiatry* **12**, 1–12 (2022).
- 1175 80. E.-M. Stauffer, R. A. I. Bethlehem, L. Dorfschmidt, H. Won, V. Warrier, E. T. Bullmore, The genetic



- relationships between brain structure and schizophrenia. *Nat Commun* **14**, 7820 (2023).
81. S. H. Lee, S. Ripke, B. M. Neale, S. V. Faraone, S. M. Purcell, R. H. Perlis, B. J. Mowry, A. Thapar, M. E. Goddard, J. S. Witte, D. Absher, I. Agartz, H. Akil, F. Amin, O. A. Andreassen, A. Anjorin, R. Anney, V. Anttila, D. E. Arking, P. Asherson, M. H. Azevedo, L. Backlund, J. A. Badner, A. J. Bailey, T. Banaschewski, J. D. Barchas, M. R. Barnes, T. B. Barrett, N. Bass, A. Battaglia, M. Bauer, M. Bayés, F. Bellivier, S. E. Bergen, W. Berrettini, C. Betancur, T. Bettecken, J. Biederman, E. B. Binder, D. W. Black, D. H. R. Blackwood, C. S. Bloss, M. Boehnke, D. I. Boomsma, G. Breen, R. Breuer, R. Bruggeman, P. Cormican, N. G. Buccola, J. K. Buitelaar, W. E. Bunney, J. D. Buxbaum, W. F. Byerley, E. M. Byrne, S. Caesar, W. Cahn, R. M. Cantor, M. Casas, A. Chakravarti, K. Chambert, K. Choudhury, S. Cichon, C. R. Cloninger, D. A. Collier, E. H. Cook, H. Coon, B. Cormand, A. Corvin, W. H. Coryell, D. W. Craig, I. W. Craig, J. Crosbie, M. L. Cuccaro, D. Curtis, D. Czamara, S. Datta, G. Dawson, R. Day, E. J. De Geus, F. Degenhardt, S. Djurovic, G. J. Donohoe, A. E. Doyle, J. Duan, F. Dudbridge, E. Duketis, R. P. Ebstein, H. J. Edenberg, J. Elia, S. Ennis, B. Etain, A. Fanous, A. E. Farmer, I. N. Ferrier, M. Flickinger, E. Fombonne, T. Foroud, J. Frank, B. Franke, C. Fraser, R. Freedman, N. B. Freimer, C. M. Freitag, M. Friedl, L. Frisén, L. Gallagher, P. V. Gejman, L. Georgieva, E. S. Gershon, D. H. Geschwind, I. Giegling, M. Gill, S. D. Gordon, K. Gordon-Smith, E. K. Green, T. A. Greenwood, D. E. Grice, M. Gross, D. Grozeva, W. Guan, H. Gurling, L. De Haan, J. L. Haines, H. Hakonarson, J. Hallmayer, S. P. Hamilton, M. L. Hamshere, T. F. Hansen, A. M. Hartmann, M. Hautzinger, A. C. Heath, A. K. Henders, S. Herms, I. B. Hickie, M. Hipolito, S. Hoefels, P. A. Holmans, F. Holsboer, W. J. Hoogendijk, J.-J. Hottenga, C. M. Hultman, V. Hus, A. Ingason, M. Ising, S. Jamain, E. G. Jones, I. Jones, L. Jones, J.-Y. Tzeng, A. K. Kähler, R. S. Kahn, R. Kandaswamy, M. C. Keller, J. L. Kennedy, E. Kenny, L. Kent, Y. Kim, G. K. Kirov, S. M. Klauck, L. Klei, J. A. Knowles, M. A. Kohli, D. L. Koller, B. Konte, A. Korszun, L. Krabbendam, R. Krasucki, J. Kuntsi, P. Kwan, M. Landén, N. Långström, M. Lathrop, J. Lawrence, W. B. Lawson, M. Leboyer, D. H. Ledbetter, P. H. Lee, T. Lencz, K.-P. Lesch, D. F. Levinson, C. M. Lewis, J. Li, P. Lichtenstein, J. A. Lieberman, D.-Y. Lin, D. H. Linszen, C. Liu, F. W. Lohoff, S. K. Loo, C. Lord, J. K. Lowe, S. Lucae, D. J. MacIntyre, P. A. F. Madden, E. Maestrini, P. K. E. Magnusson, P. B. Mahon, W. Maier, A. K. Malhotra, S. M. Mane, C. L. Martin, N. G. Martin, M. Mattheisen, K. Matthews, M. Mattingdal, S. A. McCarrroll, K. A. McGhee, J. J. McGough, P. J. McGrath, P. McGuffin, M. G. McInnis, A. McIntosh, R. McKinney, A. W. McLean, F. J. McMahon, W. M. McMahon, A. McQuillin, H. Medeiros, S. E. Medland, S. Meier, I. Melle, F. Meng, J. Meyer, C. M. Middeldorp, L. Middleton, V. Milanova, A. Miranda, A. P. Monaco, G. W. Montgomery, J. L. Moran, D. Moreno-De-Luca, G. Morken, D. W. Morris, E. M. Morrow, V. Moskvina, P. Muglia, T. W. Mühleisen, W. J. Muir, B. Müller-Myhsok, M. Murtha, R. M. Myers, I. Myin-Germeys, M. C. Neale, S. F. Nelson, C. M. Nievergelt, I. Nikolov, V. Nimgaonkar, W. A. Nolen, M. M. Nöthen, J. I. Nurnberger, E. A. Nwulia, D. R. Nyholt, C. O'Dushlaine, R. D. Oades, A. Olincy, G. Oliveira, L. Olsen, R. A. Ophoff, U. Osby, M. J. Owen, A. Palotie, J. R. Parr, A. D. Paterson, C. N. Pato, M. T. Pato, B. W. Penninx, M. L. Pergadia, M. A. Pericak-Vance, B. S. Pickard, J. Pimm, J. Piven, D. Posthuma, J. B. Potash, F. Poustka, P. Propping, V. Puri, D. J. Quedsted, E. M. Quinn, J. A. Ramos-Quiroga, H. B. Rasmussen, S. Raychaudhuri, K. Rehnström, A. Reif, M. Ribasés, J. P. Rice, M. Rietschel, K. Roeder, H. Roeyers, L. Rossin, A. Rothenberger, G. Rouleau, D. Ruderfer, D. Rujescu, A. R. Sanders, S. J. Sanders, S. L. Santangelo, J. A. Sergeant, R. Schachar, M. Schalling, Cross-Disorder Group of the Psychiatric Genomics Consortium, Genetic relationship between five psychiatric disorders estimated from genome-wide SNPs. *Nat Genet* **45**, 984–994 (2013).
82. M. Madre, E. J. Canales-Rodríguez, P. Fuentes-Claramonte, S. Alonso-Lana, P. Salgado-Pineda, A. Guerrero-Pedraza, N. Moro, C. Bosque, J. J. Gomar, J. Ortíz-Gil, J. M. Goikolea, C. M. Bonnin, E. Vieta, S. Sarró, T. Maristany, P. J. McKenna, R. Salvador, E. Pomarol-Clotet, Structural abnormality in schizophrenia versus bipolar disorder: A whole brain cortical thickness, surface area, volume and gyrification analyses. *NeuroImage: Clinical* **25**, 102131 (2020).
83. M. Canavan, M. J. O'Donnell, Hypertension and Cognitive Impairment: A Review of Mechanisms and Key Concepts. *Front Neurol* **13**, 821135 (2022).
84. L. M. Jenkins, C. R. Garner, S. Kurian, J. P. Higgins, T. B. Parrish, S. Sedaghat, A. J. Nemeth, D. M. Lloyd-Jones, L. J. Launer, J. M. Hausdorff, L. Wang, F. A. Sorond, Cumulative Blood Pressure Exposure, Basal Ganglia, and Thalamic Morphology in Midlife. *Hypertension* **75**, 1289–1295 (2020).
85. Y. Halchenko, K. Meyer, B. Poldrack, D. Solanky, A. Wagner, J. Gors, D. MacFarlane, D. Pustina, V. Sochat, S. Ghosh, C. Mönch, C. Markiewicz, L. Waite, I. Shlyakhter, A. De La Vega, S. Hayashi, C. Häusler, J.-B. Poline, T. Kadelka, K. Skytén, D. Jarecka, D. Kennedy, T. Strauss, M. Cieslak, P. Vavra, H.-I. Ioanas, R. Schneider, M. Pflüger, J. Haxby, S. Eickhoff, M. Hanke, DataLad: distributed system for joint management of code, data, and their relationship. *JOSS* **6**, 3262 (2021).
86. C. C. Chang, C. C. Chow, L. C. Tellier, S. Vattikuti, S. M. Purcell, J. J. Lee, Second-generation PLINK: rising to the challenge of larger and richer datasets. *GigaSci* **4**, 7 (2015).
87. C. Bycroft, C. Freeman, D. Petkova, G. Band, L. T. Elliott, K. Sharp, A. Motyer, D. Vukcevic, O. Delaneau, J. O'Connell, A. Cortes, S. Welsh, A. Young, M. Effingham, G. McVean, S. Leslie, N. Allen, P. Donnelly, J. Marchini, The UK Biobank resource with deep phenotyping and genomic data. *Nature* **562**, 203–209 (2018).
88. M. Mills, N. Barban, F. C. Tropf, *An Introduction to Statistical Genetic Data Analysis* (The MIT Press, Cambridge, Massachusetts London, England, 2020).

- 1237 89. J. Graffelman, V. Moreno, The mid p-value in exact tests for Hardy-Weinberg equilibrium. *Statistical*  
1238 *Applications in Genetics and Molecular Biology* **12** (2013).
- 1239 90. A. M. Dale, M. I. Sereno, Improved Localizadon of Cortical Activity by Combining EEG and MEG with  
1240 MRI Cortical Surface Reconstruction: A Linear Approach. *Journal of Cognitive Neuroscience* **5**, 162–176 (1993).
- 1241 91. A. M. Dale, B. Fischl, M. I. Sereno, Cortical Surface-Based Analysis. *NeuroImage* **9**, 179–194 (1999).
- 1242 92. B. Fischl, M. I. Sereno, A. M. Dale, Cortical Surface-Based Analysis. *NeuroImage* **9**, 195–207 (1999).
- 1243 93. B. Fischl, M. I. Sereno, R. B. H. Tootell, A. M. Dale, High-resolution intersubject averaging and a  
1244 coordinate system for the cortical surface. *Hum. Brain Mapp.* **8**, 272–284 (1999).
- 1245 94. B. Fischl, D. H. Salat, E. Busa, M. Albert, M. Dieterich, C. Haselgrove, A. van der Kouwe, R. Killiany, D.  
1246 Kennedy, S. Klaveness, A. Montillo, N. Makris, B. Rosen, A. M. Dale, Whole Brain Segmentation: Automated  
1247 Labeling of Neuroanatomical Structures in the Human Brain. *Neuron* **33**, 341–355 (2002).
- 1248 95. The 1000 Genomes Project Consortium, A. Auton, G. R. Abecasis, D. M. Altshuler, R. M. Durbin, G. R.  
1249 Abecasis, D. R. Bentley, A. Chakravarti, A. G. Clark, P. Donnelly, E. E. Eichler, P. Flicek, S. B. Gabriel, R. A.  
1250 Gibbs, E. D. Green, M. E. Hurles, B. M. Knoppers, J. O. Korbel, E. S. Lander, C. Lee, H. Lehrach, E. R. Mardis, G.  
1251 T. Marth, G. A. McVean, D. A. Nickerson, J. P. Schmidt, S. T. Sherry, J. Wang, R. K. Wilson, R. A. Gibbs, E.  
1252 Boerwinkle, H. Doddapaneni, Y. Han, V. Korchina, C. Kovar, S. Lee, D. Muzny, Jeffrey G. Reid, Y. Zhu, J. Wang,  
1253 Y. Chang, Q. Feng, X. Fang, X. Guo, M. Jian, H. Jiang, X. Jin, T. Lan, G. Li, J. Li, Y. Li, S. Liu, X. Liu, Y. Lu, X.  
1254 Ma, M. Tang, B. Wang, G. Wang, H. Wu, R. Wu, X. Xu, Y. Yin, D. Zhang, W. Zhang, J. Zhao, M. Zhao, X. Zheng,  
1255 E. S. Lander, D. M. Altshuler, S. B. Gabriel, N. Gupta, N. Gharani, L. H. Toji, N. P. Gerry, A. M. Resch, P. Flicek, J.  
1256 Barker, L. Clarke, L. Gil, S. E. Hunt, G. Kelman, E. Kulesha, R. Leinonen, W. M. McLaren, R. Radhakrishnan, A.  
1257 Roa, D. Smirnov, R. E. Smith, I. Streeter, A. Thormann, I. Toneva, B. Vaughan, X. Zheng-Bradley, D. R. Bentley, R.  
1258 Grocock, S. Humphray, T. James, Z. Kingsbury, H. Lehrach, R. Sudbrak, M. W. Albrecht, V. S. Amstislavskiy, T. A.  
1259 Borodina, M. Lienhard, F. Mertes, M. Sultan, B. Timmermann, M.-L. Yaspo, E. R. Mardis, R. K. Wilson, L. Fulton,  
1260 R. Fulton, S. T. Sherry, V. Ananiev, Z. Belaia, D. Beloslyudtsev, N. Bouk, C. Chen, D. Church, R. Cohen, C. Cook,  
1261 J. Garner, T. Hefferon, M. Kimelman, C. Liu, J. Lopez, P. Meric, C. O’Sullivan, Y. Ostapchuk, L. Phan, S.  
1262 Ponomarov, V. Schneider, E. Shekhtman, K. Sirotkin, D. Slotta, H. Zhang, G. A. McVean, R. M. Durbin, S.  
1263 Balasubramaniam, J. Burton, P. Danecek, T. M. Keane, A. Kolb-Kokocinski, S. McCarthy, J. Stalker, M. Quail, J. P.  
1264 Schmidt, C. J. Davies, J. Gollub, T. Webster, B. Wong, Y. Zhan, A. Auton, C. L. Campbell, Y. Kong, A. Marcketta,  
1265 R. A. Gibbs, F. Yu, L. Antunes, M. Bainbridge, D. Muzny, A. Sabo, Z. Huang, J. Wang, L. J. M. Coin, L. Fang, X.  
1266 Guo, X. Jin, G. Li, Q. Li, Y. Li, Z. Li, H. Lin, B. Liu, R. Luo, H. Shao, Y. Xie, C. Ye, C. Yu, F. Zhang, H. Zheng, H.  
1267 Zhu, C. Alkan, E. Dal, F. Kahveci, G. T. Marth, E. P. Garrison, D. Kural, W.-P. Lee, W. Fung Leong, M. Stromberg,  
1268 A. N. Ward, J. Wu, M. Zhang, M. J. Daly, M. A. DePristo, R. E. Handsaker, D. M. Altshuler, E. Banks, G. Bhatia, G.  
1269 del Angel, S. B. Gabriel, G. Genovese, N. Gupta, H. Li, S. Kashin, E. S. Lander, S. A. McCarroll, J. C. Nemes, R.  
1270 E. Poplin, S. C. Yoon, J. Lihm, V. Makarov, A. G. Clark, S. Gottipati, A. Keinan, J. L. Rodriguez-Flores, J. O.  
1271 Korbel, T. Rausch, M. H. Fritz, A. M. Stütz, P. Flicek, K. Beal, L. Clarke, A. Datta, J. Herrero, W. M. McLaren, G.  
1272 R. S. Ritchie, R. E. Smith, D. Zerbino, X. Zheng-Bradley, P. C. Sabeti, I. Shlyakhter, S. F. Schaffner, J. Vitti, D. N.  
1273 Cooper, E. V. Ball, P. D. Stenson, D. R. Bentley, B. Barnes, M. Bauer, R. Keira Cheetham, A. Cox, M. Eberle, S.  
1274 Humphray, S. Kahn, L. Murray, J. Peden, R. Shaw, E. E. Kenny, M. A. Batzer, M. K. Konkel, J. A. Walker, D. G.  
1275 MacArthur, M. Lek, R. Sudbrak, V. S. Amstislavskiy, R. Herwig, E. R. Mardis, L. Ding, D. C. Koboldt, D. Larson,  
1276 K. Ye, S. Gravel, The 1000 Genomes Project Consortium, Corresponding authors, Steering committee, Production  
1277 group, Baylor College of Medicine, BGI-Shenzhen, Broad Institute of MIT and Harvard, Coriell Institute for Medical  
1278 Research, E. B. I. European Molecular Biology Laboratory, Illumina, Max Planck Institute for Molecular Genetics,  
1279 McDonnell Genome Institute at Washington University, US National Institutes of Health, University of Oxford, W.  
1280 T. S. Institute, Analysis group, Affymetrix, Albert Einstein College of Medicine, Bilkent University, Boston College,  
1281 Cold Spring Harbor Laboratory, Cornell University, European Molecular Biology Laboratory, Harvard University,  
1282 Human Gene Mutation Database, Icahn School of Medicine at Mount Sinai, Louisiana State University,  
1283 Massachusetts General Hospital, McGill University, N. National Eye Institute, A global reference for human genetic  
1284 variation. *Nature* **526**, 68–74 (2015).
- 1285 96. S. A. Lambert, L. Gil, S. Jupp, S. C. Ritchie, Y. Xu, A. Buniello, A. McMahon, G. Abraham, M. Chapman,  
1286 H. Parkinson, J. Danesh, J. A. L. MacArthur, M. Inouye, The Polygenic Score Catalog as an open database for  
1287 reproducibility and systematic evaluation. *Nat Genet* **53**, 420–425 (2021).
- 1288 97. D. Lai, E. C. Johnson, S. Colbert, G. Pandey, G. Chan, L. Bauer, M. W. Francis, V. Hesselbrock, C.  
1289 Kamarajan, J. Kramer, W. Kuang, S. Kuo, S. Kuperman, Y. Liu, V. McCutcheon, Z. Pang, M. H. Plawecki, M.  
1290 Schuckit, J. Tischfield, L. Wetherill, Y. Zang, H. J. Edenberg, B. Porjesz, A. Agrawal, T. Foroud, Evaluating risk for  
1291 alcohol use disorder: Polygenic risk scores and family history. *Alcoholism: Clinical and Experimental Research* **46**,  
1292 374–383 (2022).
- 1293 98. C. T. Butts, *Yacca: Yet Another Canonical Correlation Analysis Package* (2022; [https://CRAN.R-](https://CRAN.R-project.org/package=yacca)  
1294 [project.org/package=yacca](https://CRAN.R-project.org/package=yacca)).
- 1295 99. G. Molenberghs, G. Verbeke, Likelihood Ratio, Score, and Wald Tests in a Constrained Parameter Space.  
1296 *The American Statistician* **61**, 22–27 (2007).

1297 100. M. S. Mufford, D. van der Meer, T. Kaufmann, O. Frei, R. Ramesar, P. M. Thompson, N. Jahanshad, R. A.  
1298 Morey, O. A. Andreassen, D. J. Stein, S. Dalvie, The Genetic Architecture of Amygdala Nuclei. *Biological*  
1299 *Psychiatry* **95**, 72–84 (2024).

1300  
1301

## 1302 **Acknowledgments**

1303

1304 The authors gratefully acknowledge the computing time granted by the JARA  
1305 Vergabegremium and provided on the JARA Partition part of the supercomputer JURECA  
1306 and the joint lab Supercomputing and Modeling for the Human Brain at  
1307 Forschungszentrum Jülich.

1308

### 1309 **Funding:**

1310 Helmholtz Imaging grant (NimRLS, ZT-I-PF-4-010) (SP, FR, SE, KO, KP)  
1311 Helmholtz Imaging grant (BrainShapes, ZT-I-PF-4-062) (SP, FR, SE, KO, KP)

1312

### 1313 **Author contributions:**

1314 Conceptualization: SP, SE, JW, KO, KP  
1315 Methodology: SP, KO, KP  
1316 Investigation: SP, KO, KP  
1317 Visualization: SP  
1318 Supervision: KO, KP  
1319 Writing—original draft: SP, KO, KP  
1320 Writing—review & editing: SP, FH, FR, SE, JW, KO, KP

1321

1322 **Competing interests:** Authors declare that they have no competing interests.

1323

1324 **Data and materials availability:** The primary data used in this study is from the UK  
1325 Biobank. These data can be provided by UK Biobank pending scientific review and a  
1326 completed material transfer agreement. Requests for the data should be submitted to the  
1327 UK Biobank: [www.ukbiobank.ac.uk](http://www.ukbiobank.ac.uk). Specific UK Biobank data field codes are given in  
1328 Materials and Methods. Other publicly available data sources and applications are cited in  
1329 Materials and Methods. We will make our MOSTest summary statistics available online  
1330 within the GWAS catalog: <https://ebi.ac.uk/gwas/>. We will further publish the FUMA  
1331 results within the FUMA database.

1332 This study used openly available software and codes, specifically BrainPrint  
1333 (<https://github.com/Deep-MI/BrainPrint>), MOSTest  
1334 (<https://github.com/precimed/mostest>), FUMA (<https://fuma.ctglab.nl/>), MAGMA  
1335 (<https://ctg.cncr.nl/software/magma>, also implemented in FUMA), SCORE  
1336 (<https://github.com/sriramlab/SCORE>), fastman (<https://github.com/kaustubhad/fastman>),  
1337 ggseq3d (<https://github.com/ggseg/ggseg3d/>), circlize  
1338 (<https://github.com/jokergoo/circlize>) and yacca ([https://cran.r-](https://cran.r-project.org/web/packages/yacca/)  
1339 [project.org/web/packages/yacca/](https://cran.r-project.org/web/packages/yacca/)). We further used Affinity Designer for figure design.

1340
